# Supplementary material
Source: PubMed Central journal article supplement (PMC5104659)
Supplement: NIHMS823814-supplement-supplemental_tables_and_figures.pdf [file NIHMS823814-supplement-supplemental_tables_and_figures.pdf]

**Prediction of fine particulate matter chemical components with the spatio-temporal model  
for the Multi-Ethnic Study of Atherosclerosis cohort**

Sun-Young Kim, Lianne Sheppard, Silas Bergen, Adam A. Szpiro, Paul D. Sampson, Joel D.  
Kaufman, Sverre Vedal

Text summary: This supplementary information includes 5 tables and 10 figures to provide additional information for data summary, intermediate results of modeling procedures, and modeling results.

Table S1. List of geographic variables

| Category         | Measure                                                      | Variable description                                                                                                                                                                                                                                                              |
|------------------|--------------------------------------------------------------|-----------------------------------------------------------------------------------------------------------------------------------------------------------------------------------------------------------------------------------------------------------------------------------|
| Traffic          | Distance to the nearest road                                 | Any road, A1, intersection                                                                                                                                                                                                                                                        |
|                  | Sum of road lengths within buffers of 0.05-5 km <sup>1</sup> | A1, A2+A3 <sup>3</sup> , truck route, intersections                                                                                                                                                                                                                               |
| Population       | Sum within buffers of 0.5-15 km <sup>1</sup>                 | Population in block groups                                                                                                                                                                                                                                                        |
| Land use (Urban) | Percent within buffers of 0.3-15 km <sup>1</sup>             | Urban or built-up land<br>(residential, commercial, industrial, transportation, urban)<br>Developed low, medium, and high density<br>Developed open space                                                                                                                         |
| Land use (Rural) | Percent within buffers of 0.3-15 km <sup>1</sup>             | Agricultural land (cropland, groves, feeding)<br>Rangeland (herbaceous, shrub)<br>Forest land (deciduous, evergreen, mixed)<br>Water (streams, lakes, reservoirs, bays)<br>Wetland<br>Barren land (beaches, dry salt flats, sand, mines, rock)<br>Tundra<br>Perennial snow or ice |
| Position         | Coordinates                                                  | Longitude, latitude                                                                                                                                                                                                                                                               |
| Source           | Distance to the nearest source                               | Coastline<br>Commercial area<br>Railroad<br>Railyard<br>Airport<br>Major airport<br>Large port<br>City hall <sup>4</sup>                                                                                                                                                          |
| Emissions        | Sum within buffers of 3-30 km <sup>1</sup>                   | PM <sub>2.5</sub><br>PM <sub>10</sub><br>CO                                                                                                                                                                                                                                       |

|                           |                                                                                    | SO <sub>2</sub><br>NO <sub>x</sub>            |
|---------------------------|------------------------------------------------------------------------------------|-----------------------------------------------|
| Vegetation                | Quantiles within buffers of 0.25-10 km <sup>1</sup>                                | Normalized Difference Vegetation Index (NDVI) |
| Imperviousness            | Percent within buffers of 0.05-5 km <sup>1</sup>                                   | Impervious surface                            |
| Elevation                 | Elevation above sea levels                                                         | Absolute elevation                            |
|                           | Counts of points above or below the location on buffers of 1 and 5 km <sup>1</sup> | Relative elevation                            |
| Residual oil <sup>2</sup> | Distance to the nearest boiler                                                     | Residual oil grade 4 or 6 boiler              |
|                           | Sum within buffers of 0.1-3 km <sup>1</sup>                                        | Residual oil grade 4 or 6 boiler              |

1. 0.05-5 km buffers for traffic and impervious surface: 50, 100, 300, 400, 500, 750, 1000, 1500, 3000, 5000 m; 0.5-15 km buffers for population: 500, 1000, 1500, 2000, 2500, 3000, 5000, 10000, 15000 m; 0.3-15 km buffers for land use: 300, 400, 500, 750, 1000, 1500, 3000, 5000, 10000, 15000 m; 3-30 km buffers for emission: 3, 15, and 30 km; 0.25-10 km for vegetation: 250, 500, 1000, 2500, 5000, 7500, 10000 m; 1-5 km for residual oil: 100, 150, 300, 500, 750, 1500, 3000 m

2. New York only

3. Road classification based on CFCC (Census Feature Class Code): primary highways with limited access are coded as A1, primary roads without limited access as A2, and secondary connecting roads as A3

4. Considered as a surrogate for possible pollution sources in central parts of metropolitan areas

Table S2. List of selected geographical variables for four PM<sub>2.5</sub> components

| Category           | Variable name <sup>1</sup>                                                    | Variable description                                                                                                                                      |
|--------------------|-------------------------------------------------------------------------------|-----------------------------------------------------------------------------------------------------------------------------------------------------------|
| Traffic            | ll.a1.s<radius> <sup>2</sup>                                                  | Sum of CFCC (Census Feature Class Code) A1 roads within a <radius> meter buffer in meters                                                                 |
|                    | ll.a23.s<radius>                                                              | Sum of CFCC A2 and A3 roads within a <radius> meter buffer in meters                                                                                      |
|                    | tl.s<radius>                                                                  | Sum of truck rout lengths within a <radius> meter buffer in meters                                                                                        |
|                    | interchange12.s<radius>                                                       | Sum of intersections of A1 and A2 roads within a <radius> meter buffer                                                                                    |
|                    | interchange3.s<radius>                                                        | Sum of intersections of A3 and any roads within a <radius> meter buffer                                                                                   |
|                    | intersect.s<radius>                                                           | Sum of intersections of any roads within a <radius> meter buffer                                                                                          |
|                    | log10.m.to.a1                                                                 | Log-transformed (base 10) meters to nearest A1 road                                                                                                       |
|                    | log10.m.to.interchange3                                                       | Log-transformed (base 10) meters to nearest intersection of A3 roads                                                                                      |
|                    | log10.m.to.truck                                                              | Log-transformed (base 10) meters to nearest truck route                                                                                                   |
|                    | log2.interchange12.s<radius>                                                  | Log-transformed (base 2) sum of intersections of A1 and A2 roads within a <radius> meter buffer                                                           |
|                    | log2.interchange3.s<radius>                                                   | Log-transformed (base 2) sum of intersections of A3 and any roads within a <radius> meter buffer                                                          |
|                    | log2.intersect.s<radius>                                                      | Log-transformed (base 2) sum of intersections of any roads within a <radius> meter buffer                                                                 |
| Land use           | lu.bays.p<radius>                                                             | Percentage of 1980 land use type of bays and estuaries within a <radius> meter buffer                                                                     |
|                    | lu.comm.p<radius>                                                             | Percentage of 1980 land use type of commercial and service areas within a <radius> meter buffer                                                           |
|                    | lu.crop.p<radius>                                                             | Percentage of 1980 land use type of cropland and pasture within a <radius> meter buffer                                                                   |
|                    | lu.forest.p<radius>                                                           | Percentage of 1980 land use type of deciduous forest land within a <radius> meter buffer                                                                  |
|                    | lu.green.p<radius>                                                            | Percentage of 1980 land use type of evergreen forest land within a <radius> meter buffer                                                                  |
|                    | lu.grove.p<radius>                                                            | Percentage of 1980 land use type of orchards, groves, vineyards, nurseries within a <radius> meter buffer                                                 |
|                    | lu.industrial.p<radius>                                                       | Percentage of 1980 land use type of industrial areas within a <radius> meter buffer                                                                       |
|                    | lu.oth.urban.p<radius>                                                        | Percentage of 1980 land use type of other urban or built-up land within a <radius> meter buffer                                                           |
|                    | lu.transition.p<radius>                                                       | Percentage of 1980 land use type of transitional areas within a <radius> meter buffer                                                                     |
|                    | lu.transport.p<radius>                                                        | Percentage of 1980 land use type of transportation, communications and utilities within a <radius> meter buffer                                           |
|                    | lc.anyforest.p<radius>                                                        | Percentage of 1980 land use type of woody wetland or forest area within a <radius> meter buffer                                                           |
|                    | lc.openbasic.p<radius>                                                        | Percentage of 1980 land use type of any forest, water, crop, shrub, pasture, herb, grass, and barren areas within a <radius> meter buffer                 |
|                    | lc.openplus.p<radius>                                                         | Percentage of 1980 land use type of any forest, water, crop, shrub, pasture, herb, grass, barren, and developed open space within a <radius> meter buffer |
| lc.water.p<radius> | Percentage of 1980 land use type of open water within a <radius> meter buffer |                                                                                                                                                           |

|                |                         |                                                                                                                                           |
|----------------|-------------------------|-------------------------------------------------------------------------------------------------------------------------------------------|
|                | rlu.grass.p<radius>     | Percentage of 2006 land use type of grasslands and herbaceous vegetation within a <radius> meter buffer                                   |
|                | rlu.water.p<radius>     | Percentage of 2006 land use type of open water within a <radius> meter buffer                                                             |
|                | rlu.dev.hi.p<radius>    | Percentage of 2006 land use type of developed high intensity within a <radius> meter buffer                                               |
|                | rlu.dev.med.p<radius>   | Percentage of 2006 land use type of developed medium intensity within a <radius> meter buffer                                             |
|                | rlu.dev.open.p<radius>  | Percentage of 2006 land use type of developed open space within a <radius> meter buffer                                                   |
|                | rlc.dev.medhi.p<radius> | Percentage of 2006 land use type of developed high and medium intensity within a <radius> meter buffer                                    |
|                | rlc.openbasic.p<radius> | Percentage of 2006 land use type of any forest, water, crop, shrub, pasture, herb, grass, and barren areas within a <radius> meter buffer |
|                | rlc.anyforest.p<radius> | Percentage of 2006 land use type of woody wetland or forest area within a <radius> meter buffer                                           |
| Position       | long                    | GPS longitude coordinate in decimal degrees                                                                                               |
| Source         | m.to.rr                 | Meters to the nearest railroad                                                                                                            |
|                | log10.m.to.comm         | Log-transformed (base 10) meters to nearest commercial zone                                                                               |
|                | log10.m.to.l.airp       | Log-transformed (base 10) meters to nearest large airport                                                                                 |
|                | log10.m.to.rr           | Log-transformed (base 10) meters to nearest railroad                                                                                      |
| Emissions      | em.CO.s30000            | Sum of CO emissions in tons per year from tall stacks within 30 km, minus the emissions from tall stacks within 3 km                      |
| Vegetation     | ndvi.q25.a<radius>      | Average 2006 NDVI value at the first quantile within a <radius> meter buffer                                                              |
|                | ndvi.q75.a<radius>      | Average 2006 NDVI value at the third quantile within a <radius> meter buffer                                                              |
| Imperviousness | imp.a<radius>           | Average impervious surface value (percent imperviousness) within a <radius> meter buffer                                                  |
| Elevation      | elev.1k.above           | Count of points (out of 24 concentric points) more than 20 m uphill of the location on 1 km buffer                                        |
|                | elev.1k.below           | Count of points more than 20 m downhill of the location on 1 km buffer                                                                    |
|                | elev.1k.rabove          | Square root-transformed count of points more than 20 m uphill of the location on 1 km buffer                                              |
|                | elev.1k.rbelow          | Square root-transformed count of points more than 20 m downhill of the location on 1 km buffer                                            |
|                | elev.5k.below           | Count of points more than 50 m downhill of the location on 5 km buffer                                                                    |
| Residual oil   | oil.edf4.s<radius>      | Sum of potential mega BTU (British Thermal Unit) from oil number 4 per hour within a <radius> meter buffer                                |
|                | log10.m.to.6oil         | Log-transformed (base 10) meters to nearest Number 6 oil boiler                                                                           |

1. The list of variables include variables seen in Figure S4

2. Radius of buffers were presented in Table S2

Table S3. Provisional cross-validation statistics and selected variables from trend-adjusted “long-term average” concentrations at NPACT/MESA Air home-outdoor sites

| City          | Pollutant | Cross-validation statistics <sup>1</sup> |                | Geographic variables <sup>2</sup> |                  |                  |          |        |          |            |                | Residual oil <sup>3</sup> |           |
|---------------|-----------|------------------------------------------|----------------|-----------------------------------|------------------|------------------|----------|--------|----------|------------|----------------|---------------------------|-----------|
|               |           | RMSE ( $\mu\text{g}/\text{m}^3$ )        | R <sup>2</sup> | Traffic                           | Land use (urban) | Land use (rural) | Position | Source | Emission | Vegetation | Imperviousness |                           | Elevation |
| LA            | Sulfur    | 0.17                                     | 0.21           |                                   |                  |                  |          |        |          |            |                |                           |           |
|               | Silicon   | 0.03                                     | 0.47           |                                   |                  |                  |          |        |          |            |                |                           |           |
|               | EC        | 0.24                                     | 0.80           |                                   |                  |                  |          |        |          |            |                |                           |           |
|               | OC        | 0.68                                     | 0.18           |                                   |                  |                  |          |        |          |            |                |                           |           |
| Chicago       | Sulfur    | 0.16                                     | 0.35           |                                   |                  |                  |          |        |          |            |                |                           |           |
|               | Silicon   | 0.03                                     | 0.19           |                                   |                  |                  |          |        |          |            |                |                           |           |
|               | EC        | 0.18                                     | 0.48           |                                   |                  |                  |          |        |          |            |                |                           |           |
|               | OC        | 0.35                                     | 0.47           |                                   |                  |                  |          |        |          |            |                |                           |           |
| St. Paul      | Sulfur    | 0.08                                     | 0.17           |                                   |                  |                  |          |        |          |            |                |                           |           |
|               | Silicon   | 0.03                                     | 0.10           |                                   |                  |                  |          |        |          |            |                |                           |           |
|               | EC        | 0.12                                     | 0.39           |                                   |                  |                  |          |        |          |            |                |                           |           |
|               | OC        | 0.13                                     | 0.60           |                                   |                  |                  |          |        |          |            |                |                           |           |
| Baltimore     | Sulfur    | 0.15                                     | 0.12           |                                   |                  |                  |          |        |          |            |                |                           |           |
|               | Silicon   | 0.00                                     | 0.59           |                                   |                  |                  |          |        |          |            |                |                           |           |
|               | EC        | 0.17                                     | 0.58           |                                   |                  |                  |          |        |          |            |                |                           |           |
|               | OC        | 0.20                                     | 0.70           |                                   |                  |                  |          |        |          |            |                |                           |           |
| NY            | Sulfur    | 0.41                                     | 0.13           |                                   |                  |                  |          |        |          |            |                |                           |           |
|               | Silicon   | 0.04                                     | 0.04           |                                   |                  |                  |          |        |          |            |                |                           |           |
|               | EC        | 0.60                                     | 0.55           |                                   |                  |                  |          |        |          |            |                |                           |           |
|               | OC        | 0.40                                     | 0.44           |                                   |                  |                  |          |        |          |            |                |                           |           |
| Winston-Salem | Sulfur    | 0.18                                     | 0.25           |                                   |                  |                  |          |        |          |            |                |                           |           |
|               | Silicon   | 0.00                                     | 0.21           |                                   |                  |                  |          |        |          |            |                |                           |           |
|               | EC        | 0.13                                     | 0.43           |                                   |                  |                  |          |        |          |            |                |                           |           |
|               | OC        | 0.36                                     | 0.19           |                                   |                  |                  |          |        |          |            |                |                           |           |

1. Provisional cross-validation approach based on lasso variable selection followed by all subset universal kriging
2. List of geographic variables for each category is shown in Table S1
3. Considered only for New York

Table S4. Area-specific summary statistics for the spatio-temporal and national spatial models of predicted long-term average concentrations of four PM<sub>2.5</sub> components for 5,493 MESA participants residing within 10 kilometers of any NPACT/MESA Air monitors based on addresses for 2000-2002

| Pollutant | City                 | N     | Spatio-temporal model                |                                    | National spatial model               |                                    |
|-----------|----------------------|-------|--------------------------------------|------------------------------------|--------------------------------------|------------------------------------|
|           |                      |       | Mean<br>( $\mu\text{g}/\text{m}^3$ ) | SD<br>( $\mu\text{g}/\text{m}^3$ ) | Mean<br>( $\mu\text{g}/\text{m}^3$ ) | SD<br>( $\mu\text{g}/\text{m}^3$ ) |
| Sulfur    | LA                   | 1,073 | 1.13                                 | 0.04                               | 0.53                                 | 0.02                               |
|           | Chicago              | 999   | 1.24                                 | 0.06                               | 0.75                                 | 0.03                               |
|           | Minneapolis-St. Paul | 898   | 0.81                                 | 0.01                               | 0.53                                 | 0.01                               |
|           | Baltimore            | 775   | 1.67                                 | 0.06                               | 1.00                                 | 0.03                               |
|           | NY                   | 856   | 1.46                                 | 0.13                               | 0.78                                 | 0.02                               |
|           | Winston-Salem        | 892   | 1.69                                 | 0.08                               | 0.94                                 | 0.02                               |
| Silicon   | LA                   | 1,073 | 0.14                                 | 0.02                               | 0.14                                 | 0.00                               |
|           | Chicago              | 999   | 0.11                                 | 0.01                               | 0.06                                 | 0.00                               |
|           | Minneapolis-St. Paul | 898   | 0.10                                 | 0.01                               | 0.08                                 | 0.00                               |
|           | Baltimore            | 775   | 0.09                                 | 0.01                               | 0.08                                 | 0.00                               |
|           | NY                   | 856   | 0.12                                 | 0.01                               | 0.07                                 | 0.00                               |
|           | Winston-Salem        | 892   | 0.10                                 | 0.01                               | 0.11                                 | 0.00                               |
| EC        | LA                   | 1,073 | 1.98                                 | 0.34                               | 0.83                                 | 0.14                               |
|           | Chicago              | 999   | 1.40                                 | 0.20                               | 0.74                                 | 0.13                               |
|           | Minneapolis-St. Paul | 898   | 0.85                                 | 0.08                               | 0.58                                 | 0.07                               |
|           | Baltimore            | 775   | 1.35                                 | 0.21                               | 0.68                                 | 0.15                               |
|           | NY                   | 856   | 2.38                                 | 0.44                               | 1.13                                 | 0.13                               |
|           | Winston-Salem        | 892   | 1.10                                 | 0.08                               | 0.57                                 | 0.07                               |
| OC        | LA                   | 1,073 | 2.33                                 | 0.29                               | 2.43                                 | 0.20                               |
|           | Chicago              | 999   | 1.92                                 | 0.28                               | 1.71                                 | 0.23                               |
|           | Minneapolis-St. Paul | 898   | 1.73                                 | 0.13                               | 2.09                                 | 0.19                               |
|           | Baltimore            | 775   | 2.19                                 | 0.38                               | 2.12                                 | 0.24                               |
|           | NY                   | 856   | 2.18                                 | 0.39                               | 1.64                                 | 0.20                               |
|           | Winston-Salem        | 892   | 2.63                                 | 0.16                               | 1.95                                 | 0.29                               |

Table S5. Proportion of total variance of the predictions captured by the long-term mean, temporal trend, and spatio-temporal residuals across MESA Air monitoring home-outdoor sites

| City          | Pollutant | Long-term mean <sup>1</sup> |                    | Temporal trend <sup>1</sup> | Spatio-temporal residual <sup>1</sup> |
|---------------|-----------|-----------------------------|--------------------|-----------------------------|---------------------------------------|
|               |           | Regression <sup>2</sup>     | Regression+kriging |                             |                                       |
| LA            | Sulfur    | 0.00                        | 0.01               | 0.82                        | 0.17                                  |
|               | Silicon   | 0.10                        | 0.20               | 0.32                        | 0.48                                  |
|               | EC        | 0.04                        | 0.35               | 0.50                        | 0.15                                  |
|               | OC        | 0.04                        | 0.28               | 0.36                        | 0.36                                  |
| Chicago       | Sulfur    | 0.02                        | 0.04               | 0.52                        | 0.43                                  |
|               | Silicon   | 0.07                        | 0.08               | 0.76                        | 0.15                                  |
|               | EC        | 0.26                        | 0.31               | 0.54                        | 0.16                                  |
|               | OC        | 0.19                        | 0.19               | 0.60                        | 0.22                                  |
| St. Paul      | Sulfur    | 0.00                        | 0.00               | 0.56                        | 0.44                                  |
|               | Silicon   | 0.02                        | 0.02               | 0.60                        | 0.38                                  |
|               | EC        | 0.39                        | 0.41               | 0.41                        | 0.18                                  |
|               | OC        | 0.12                        | 0.13               | 0.71                        | 0.15                                  |
| Baltimore     | Sulfur    | 0.01                        | 0.01               | 0.79                        | 0.20                                  |
|               | Silicon   | 0.11                        | 0.11               | 0.69                        | 0.19                                  |
|               | EC        | 0.48                        | 0.48               | 0.35                        | 0.17                                  |
|               | OC        | 0.10                        | 0.10               | 0.72                        | 0.18                                  |
| NY            | Sulfur    | 0.09                        | 0.09               | 0.54                        | 0.37                                  |
|               | Silicon   | 0.11                        | 0.11               | 0.39                        | 0.51                                  |
|               | EC        | 0.66                        | 0.64               | 0.36                        | 0.00                                  |
|               | OC        | 0.46                        | 0.46               | 0.43                        | 0.11                                  |
| Winston-Salem | Sulfur    | 0.01                        | 0.01               | 0.84                        | 0.15                                  |
|               | Silicon   | 0.02                        | 0.02               | 0.74                        | 0.24                                  |
|               | EC        | 0.17                        | 0.21               | 0.57                        | 0.22                                  |
|               | OC        | 0.06                        | 0.06               | 0.43                        | 0.51                                  |

1. Sum of ratios of long-term mean including regression and kriging, temporal trend, and spatio-temporal residual is equal to 1; Total variance used as denominator for calculating ratios was sum of variances of long-term mean, temporal trend, and spatio-temporal residual instead of variance of predictions given correlation structure between three parts



2. Ratio of regression part for long-term mean is separately presented to show its contribution to total variability

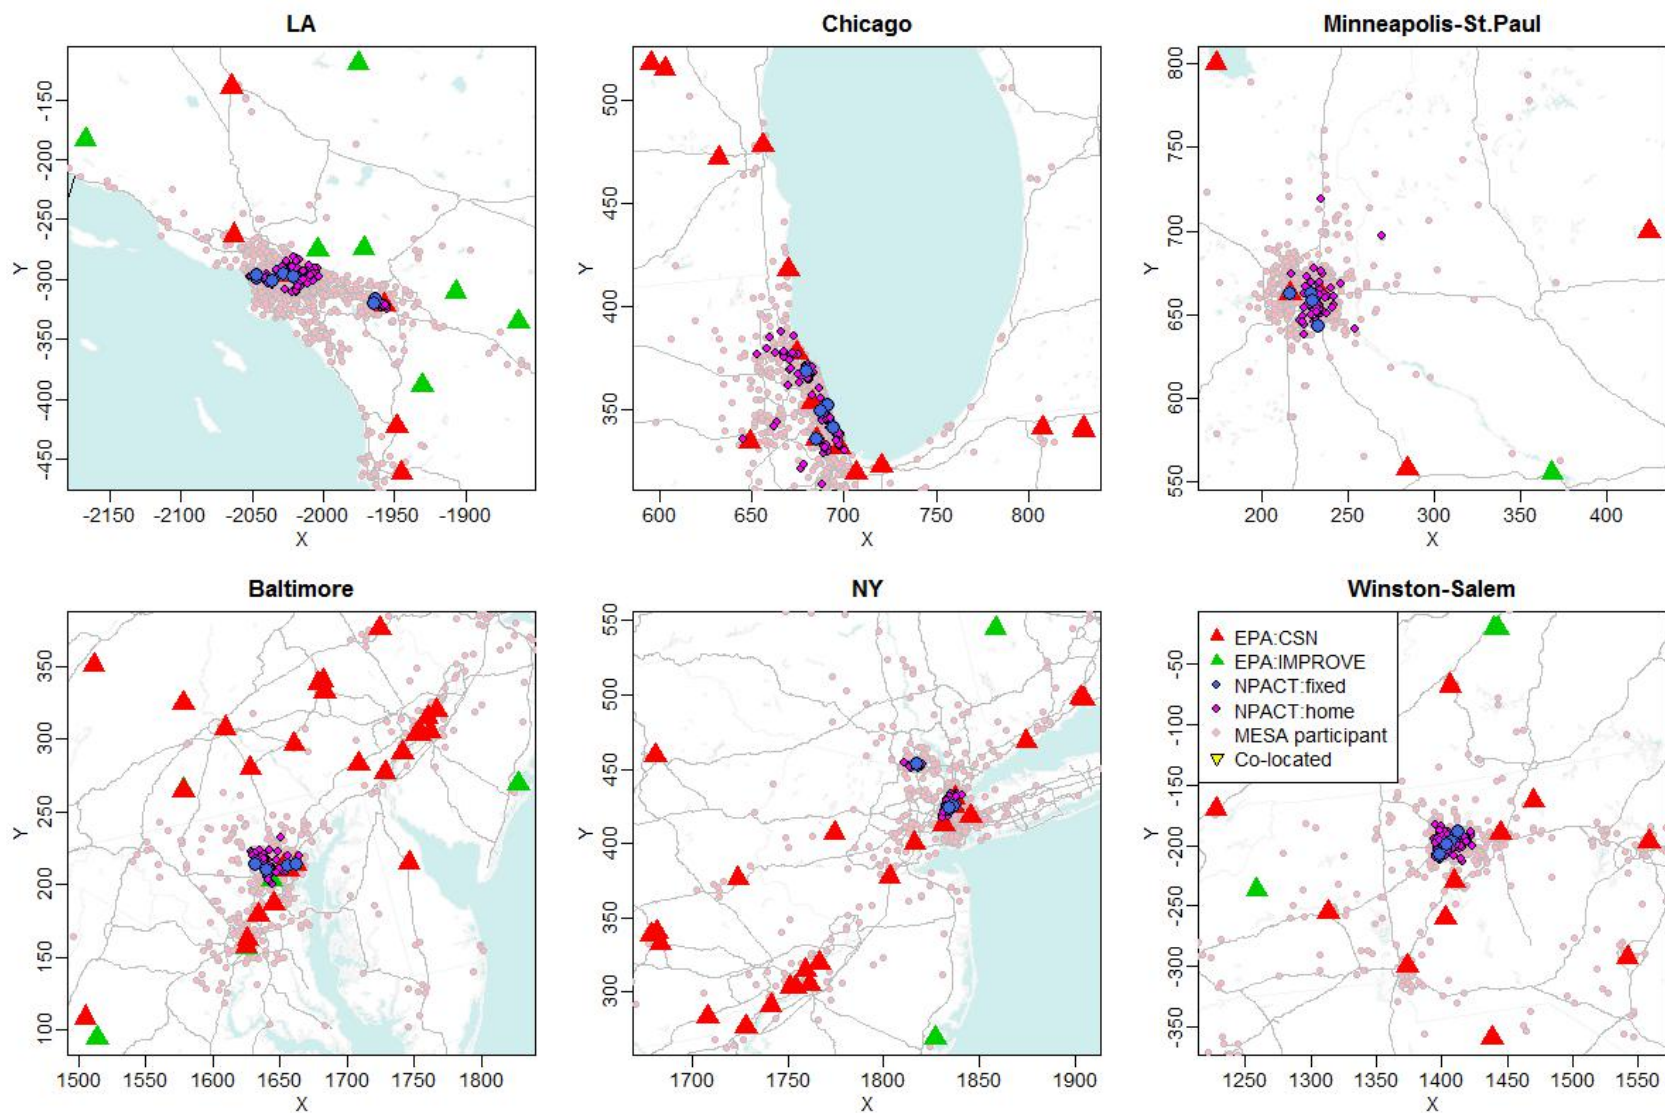

Figure S1. Regulatory and NPACT/MESA Air monitoring sites for PM<sub>2.5</sub> components located within 200 km from city centers in the six MESA city areas

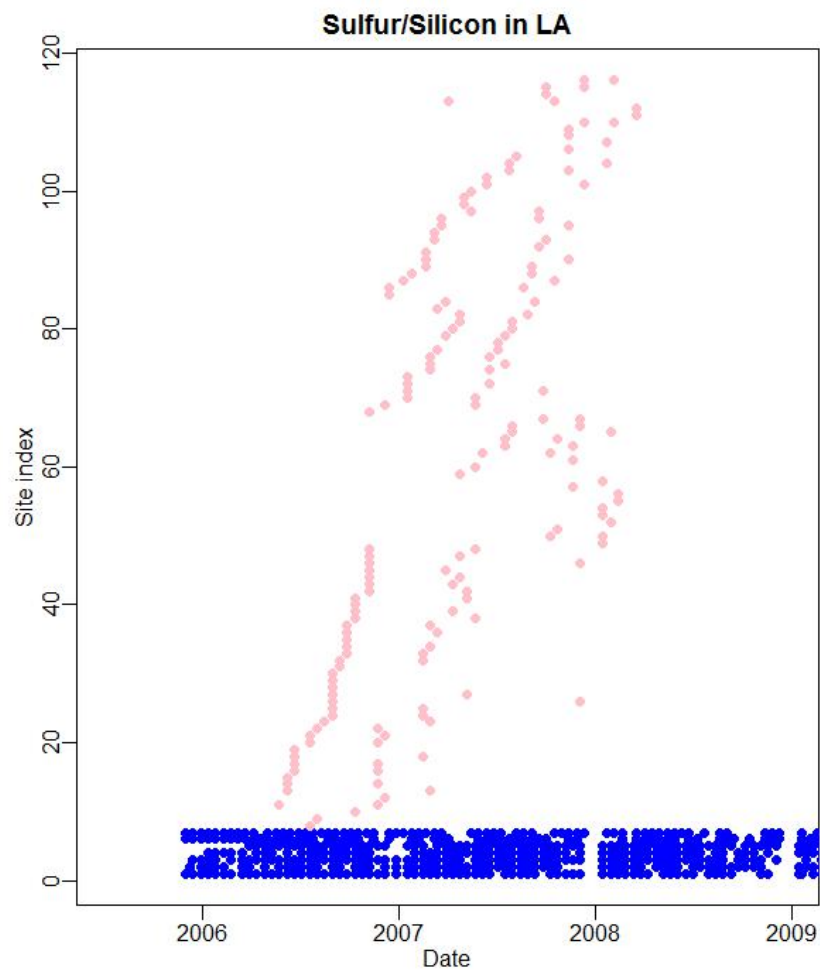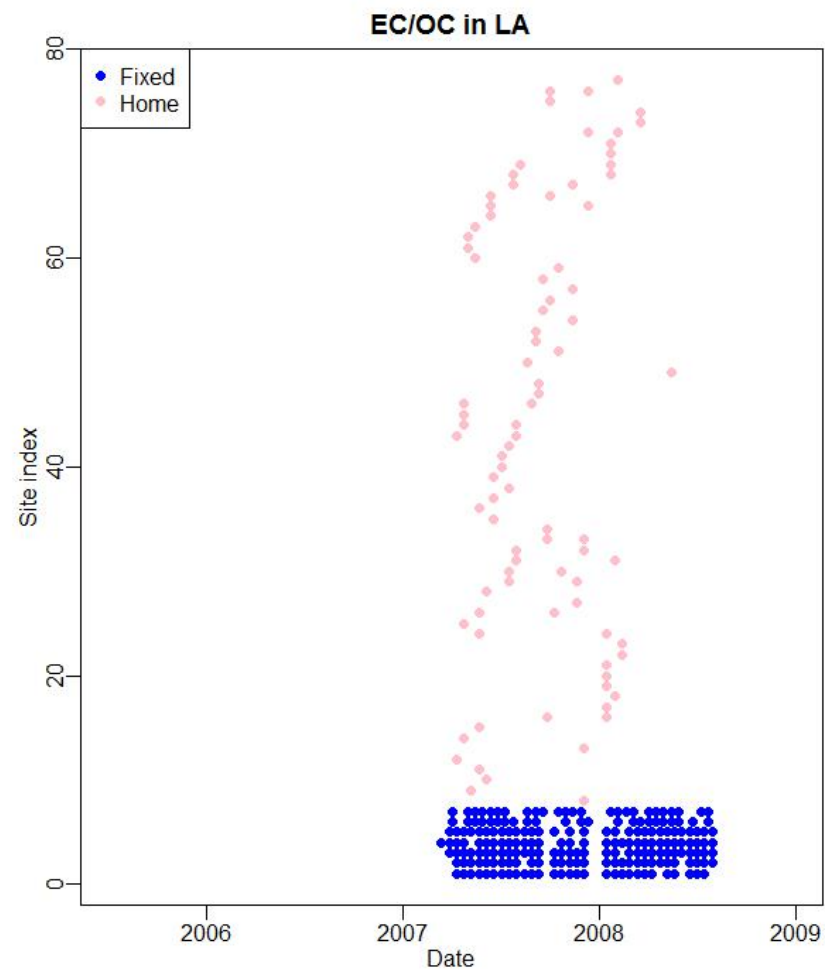

Figure S2. Temporal and spatial sampling design for silicon and EC for regulatory and NPACT/MESA Air monitors in Los Angeles

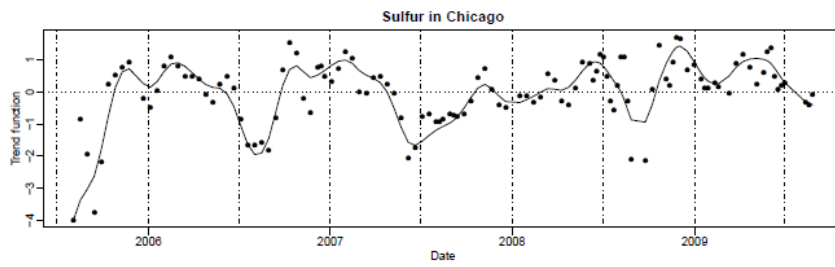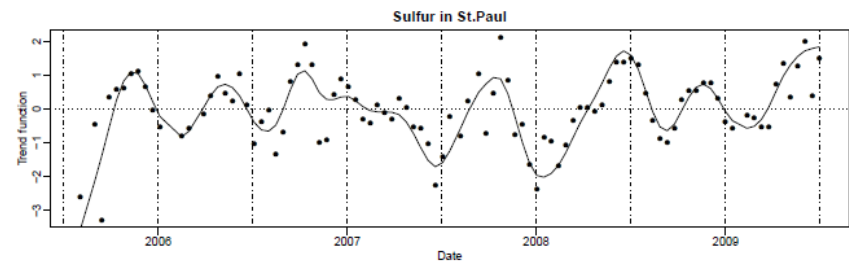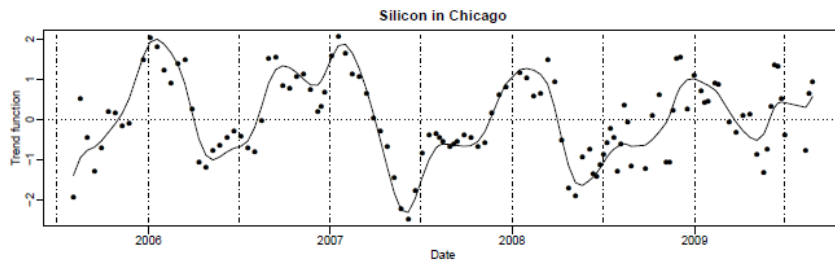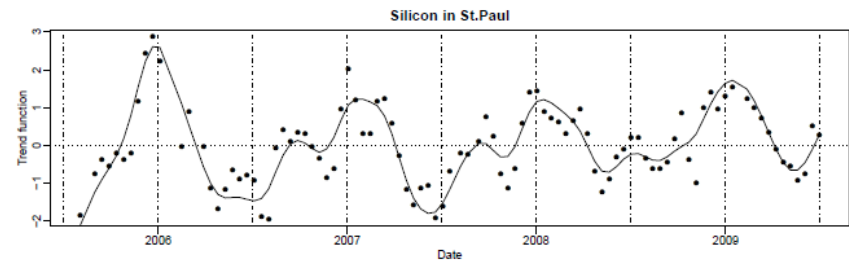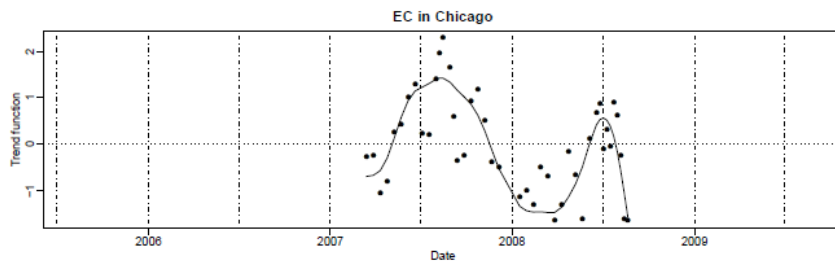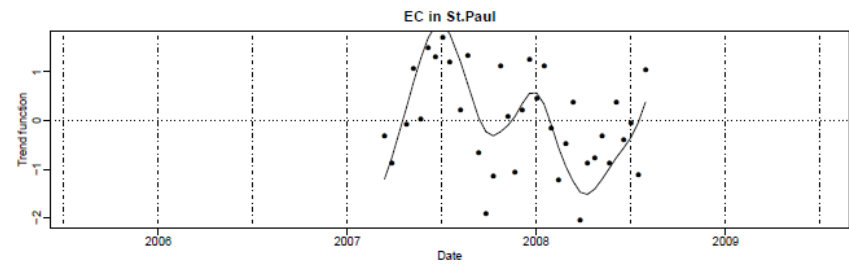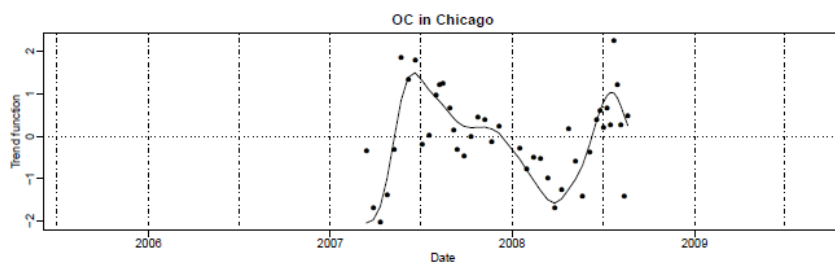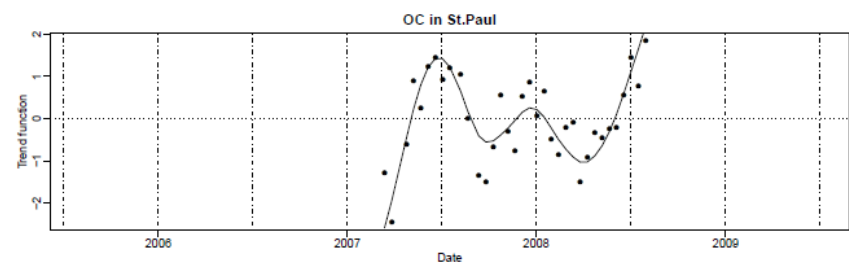

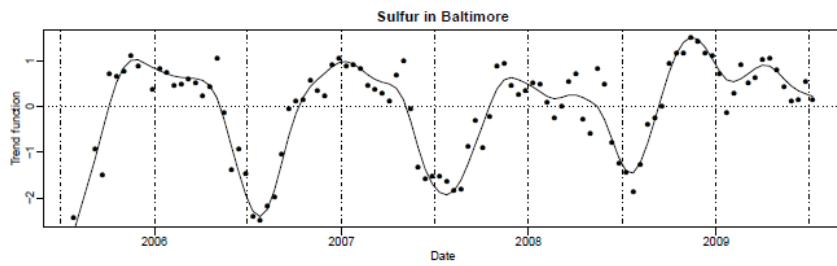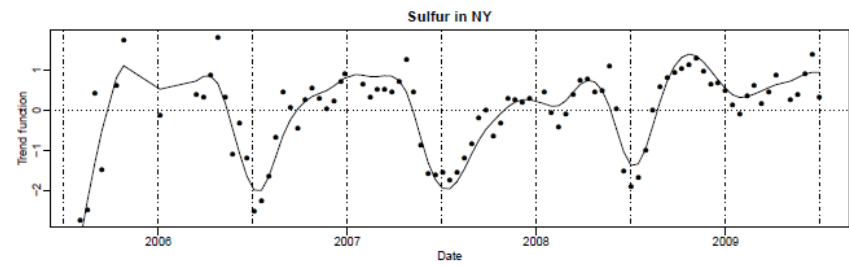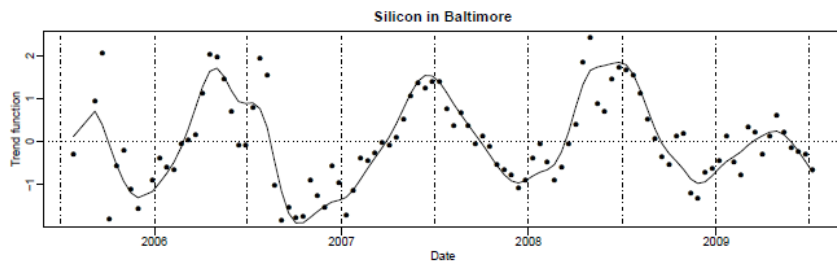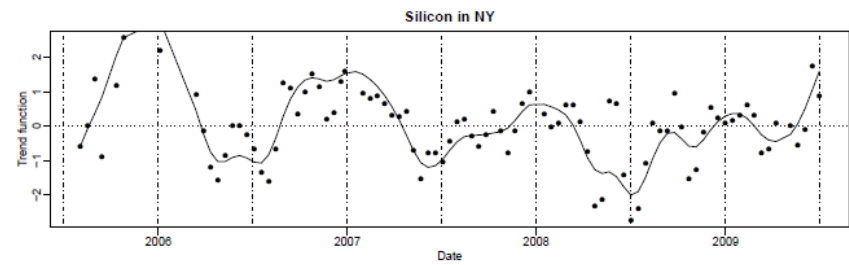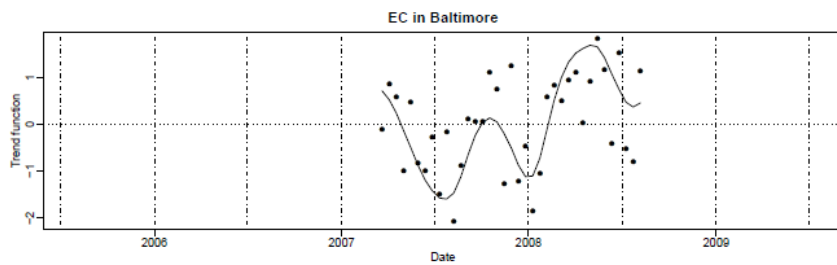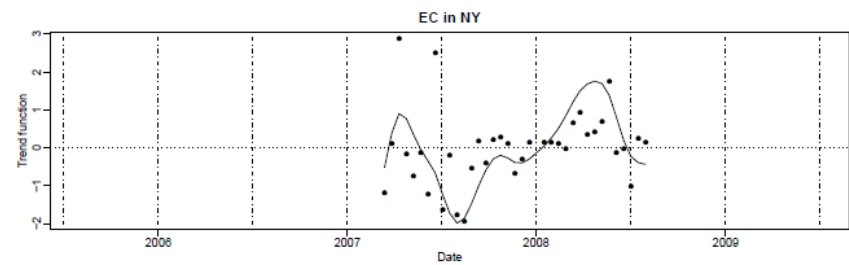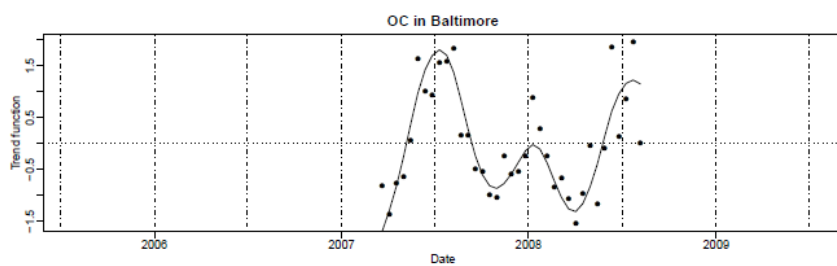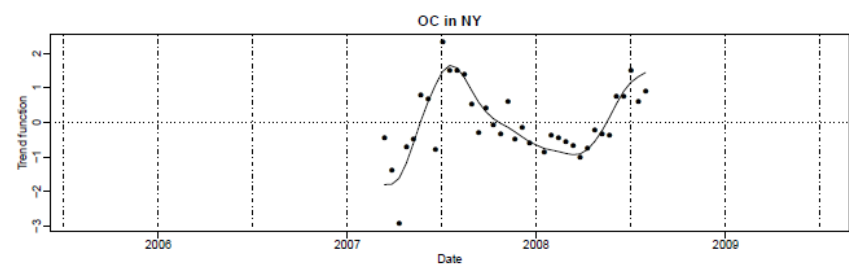

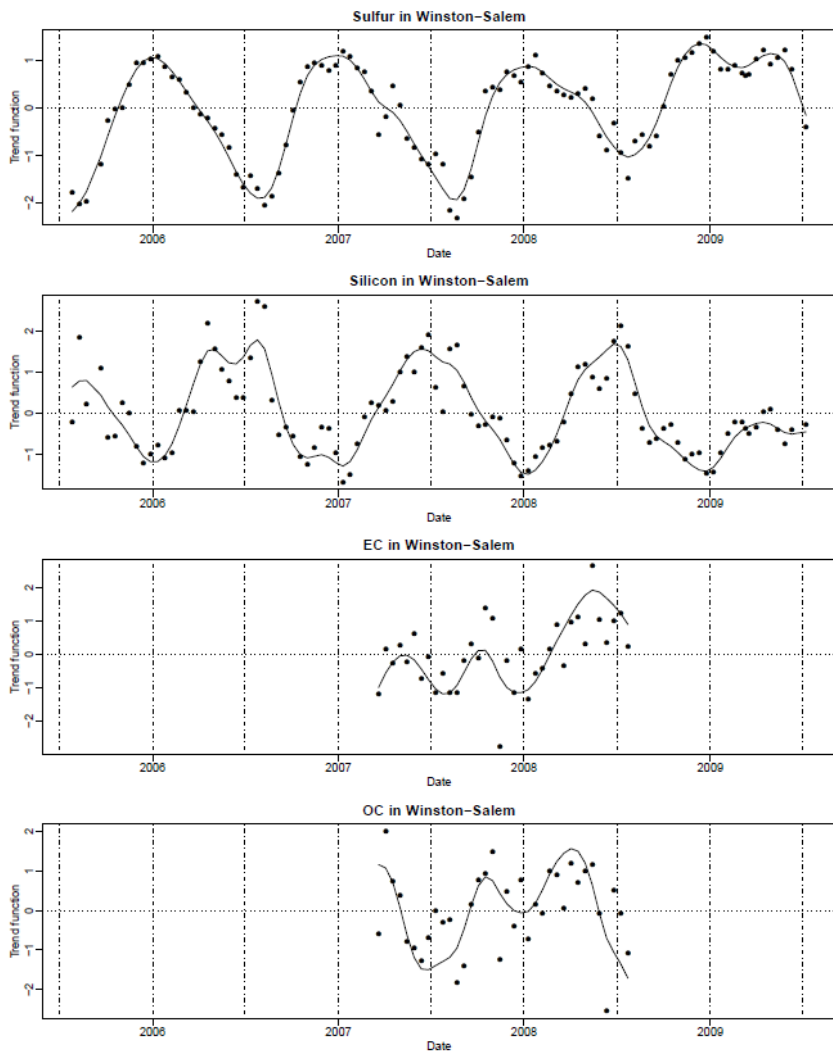

Figure S3. Estimated smooth temporal trends for four log-transformed PM<sub>2.5</sub> components in the MESA five city areas (except Los Angeles)

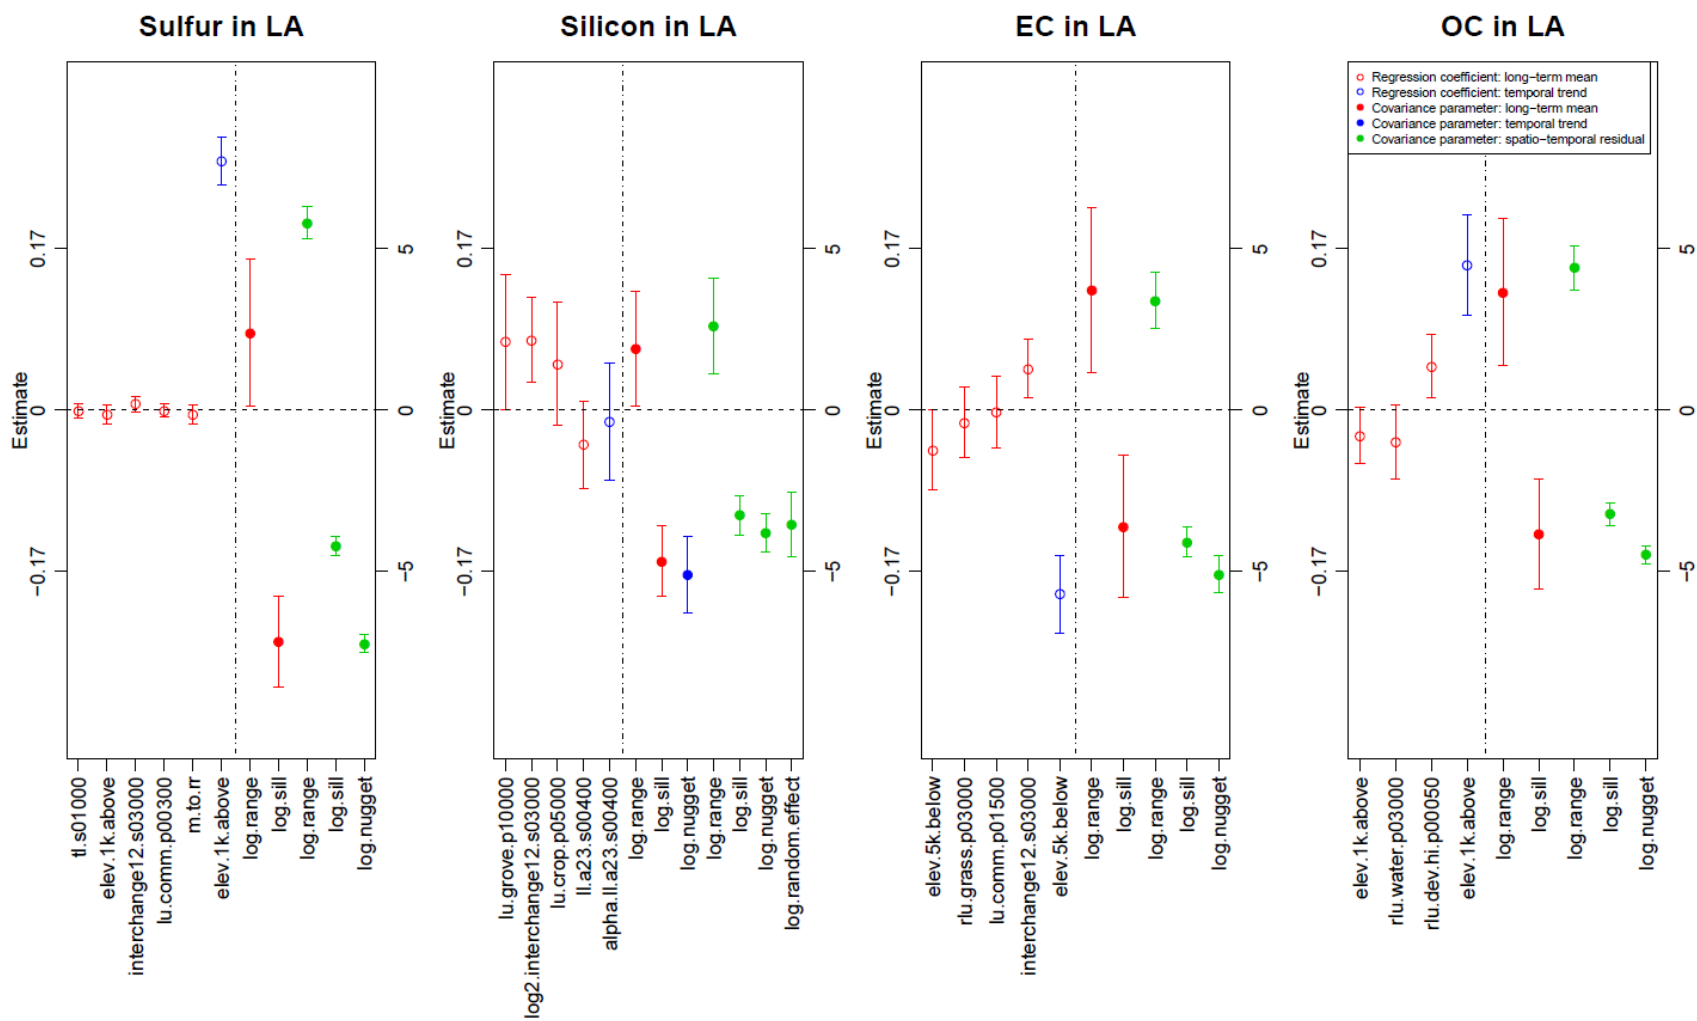

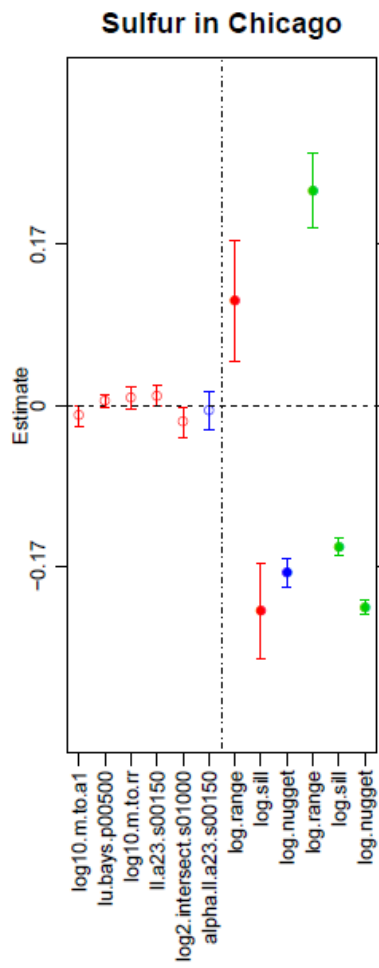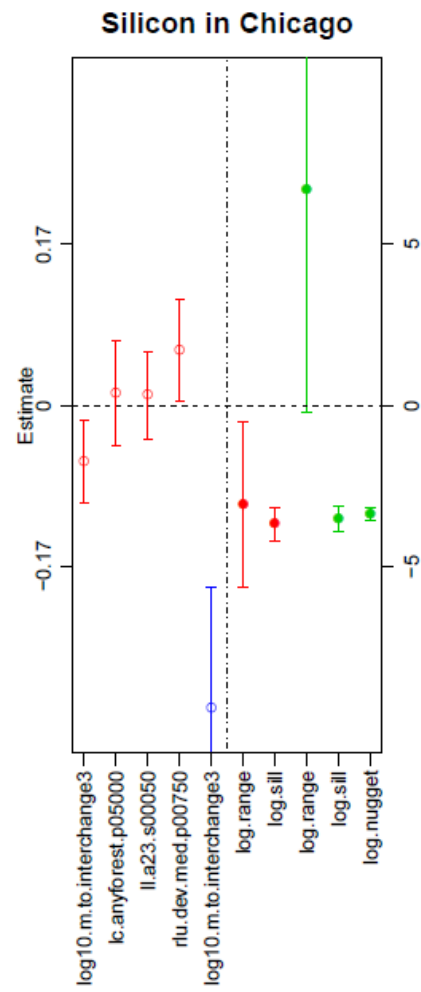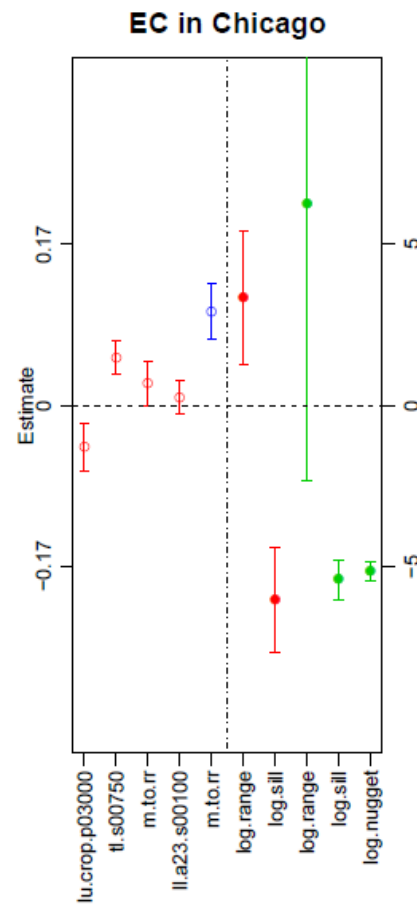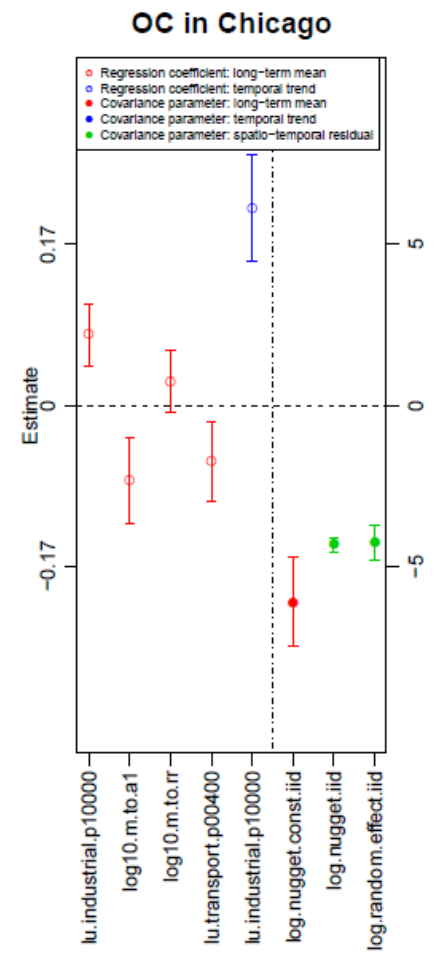



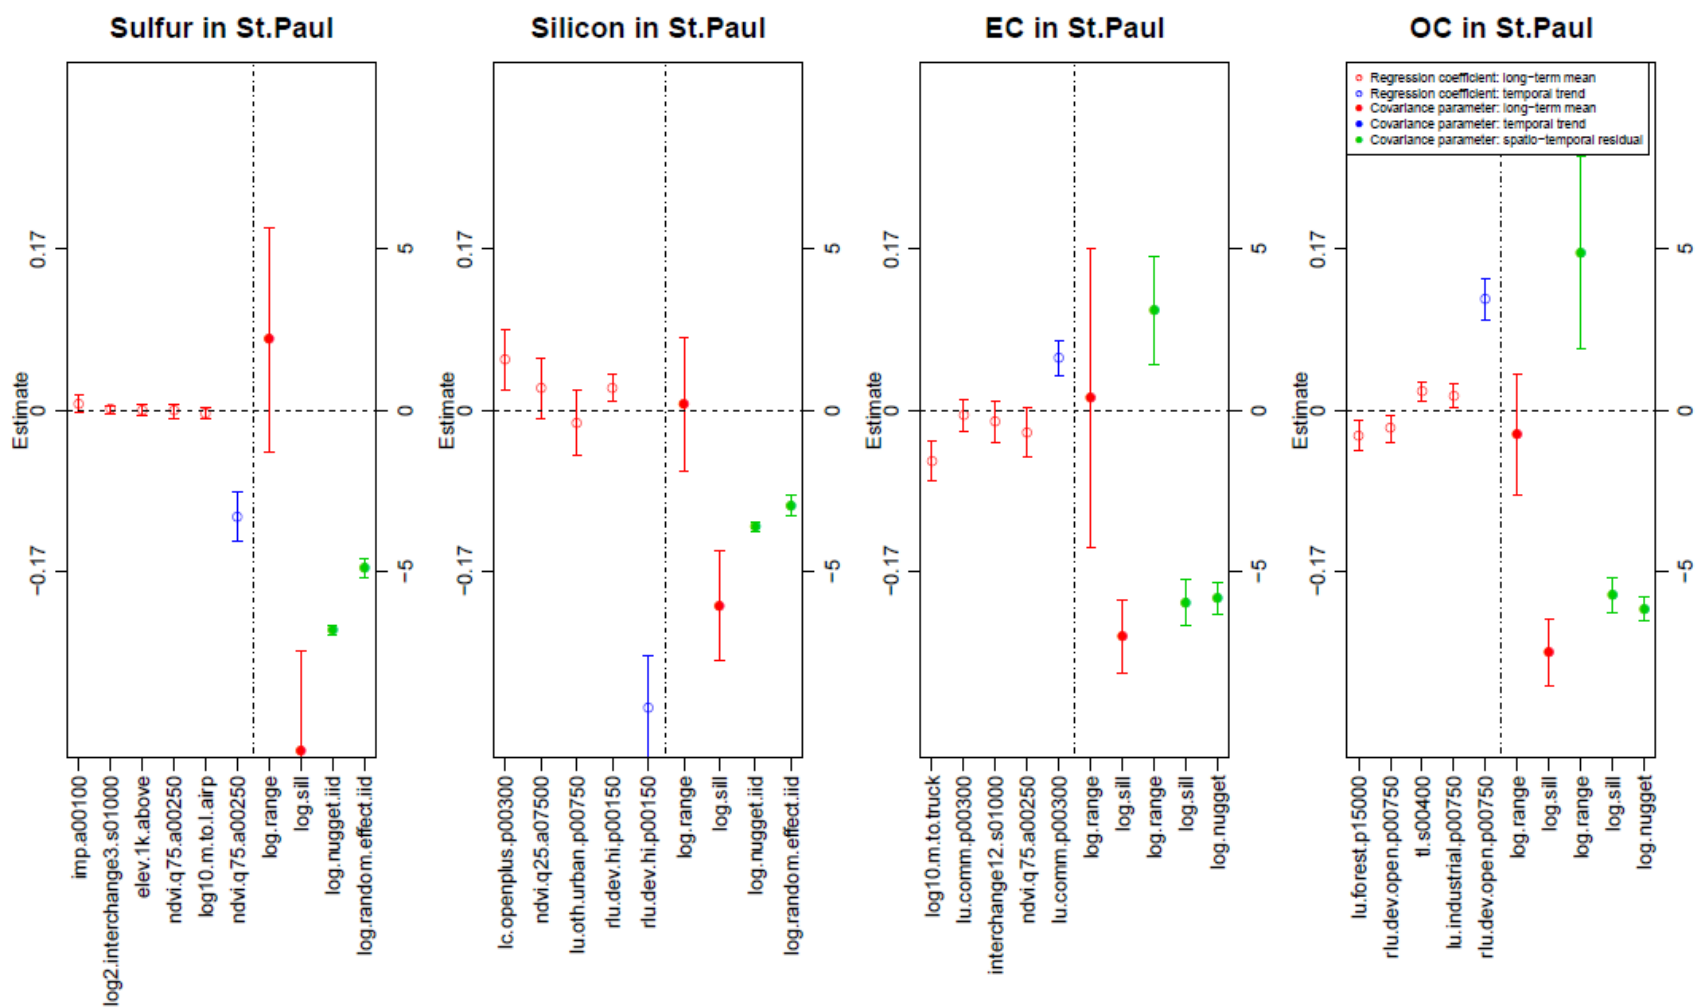

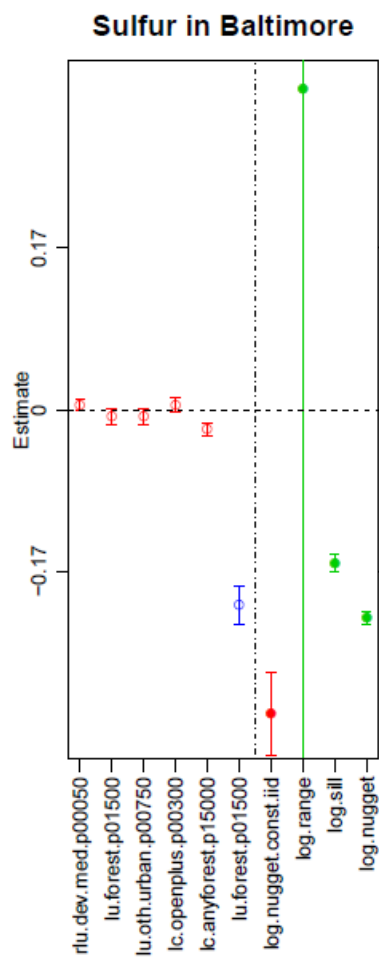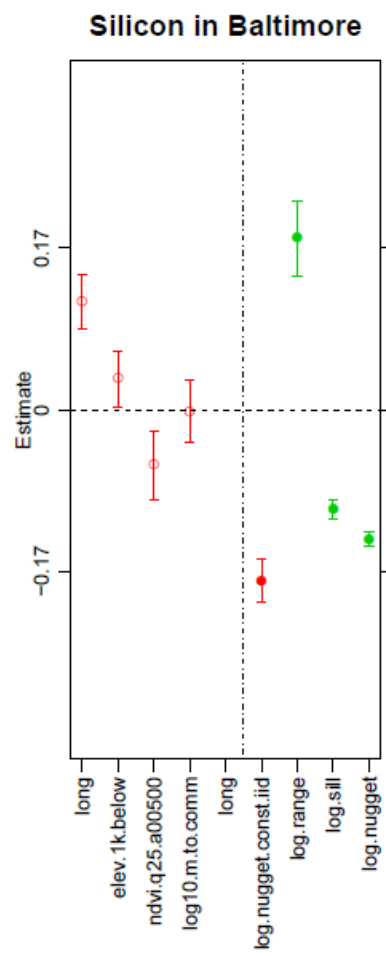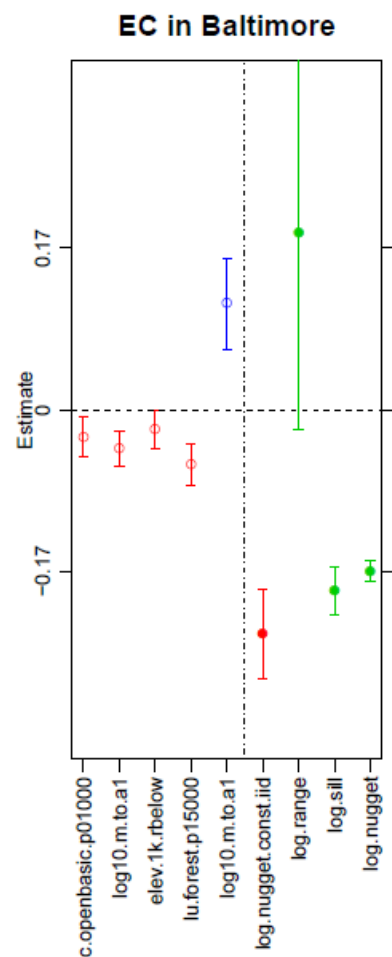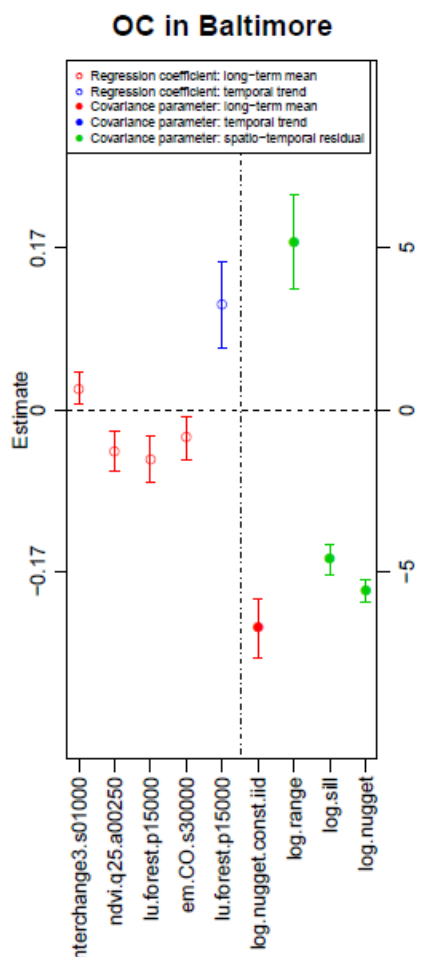

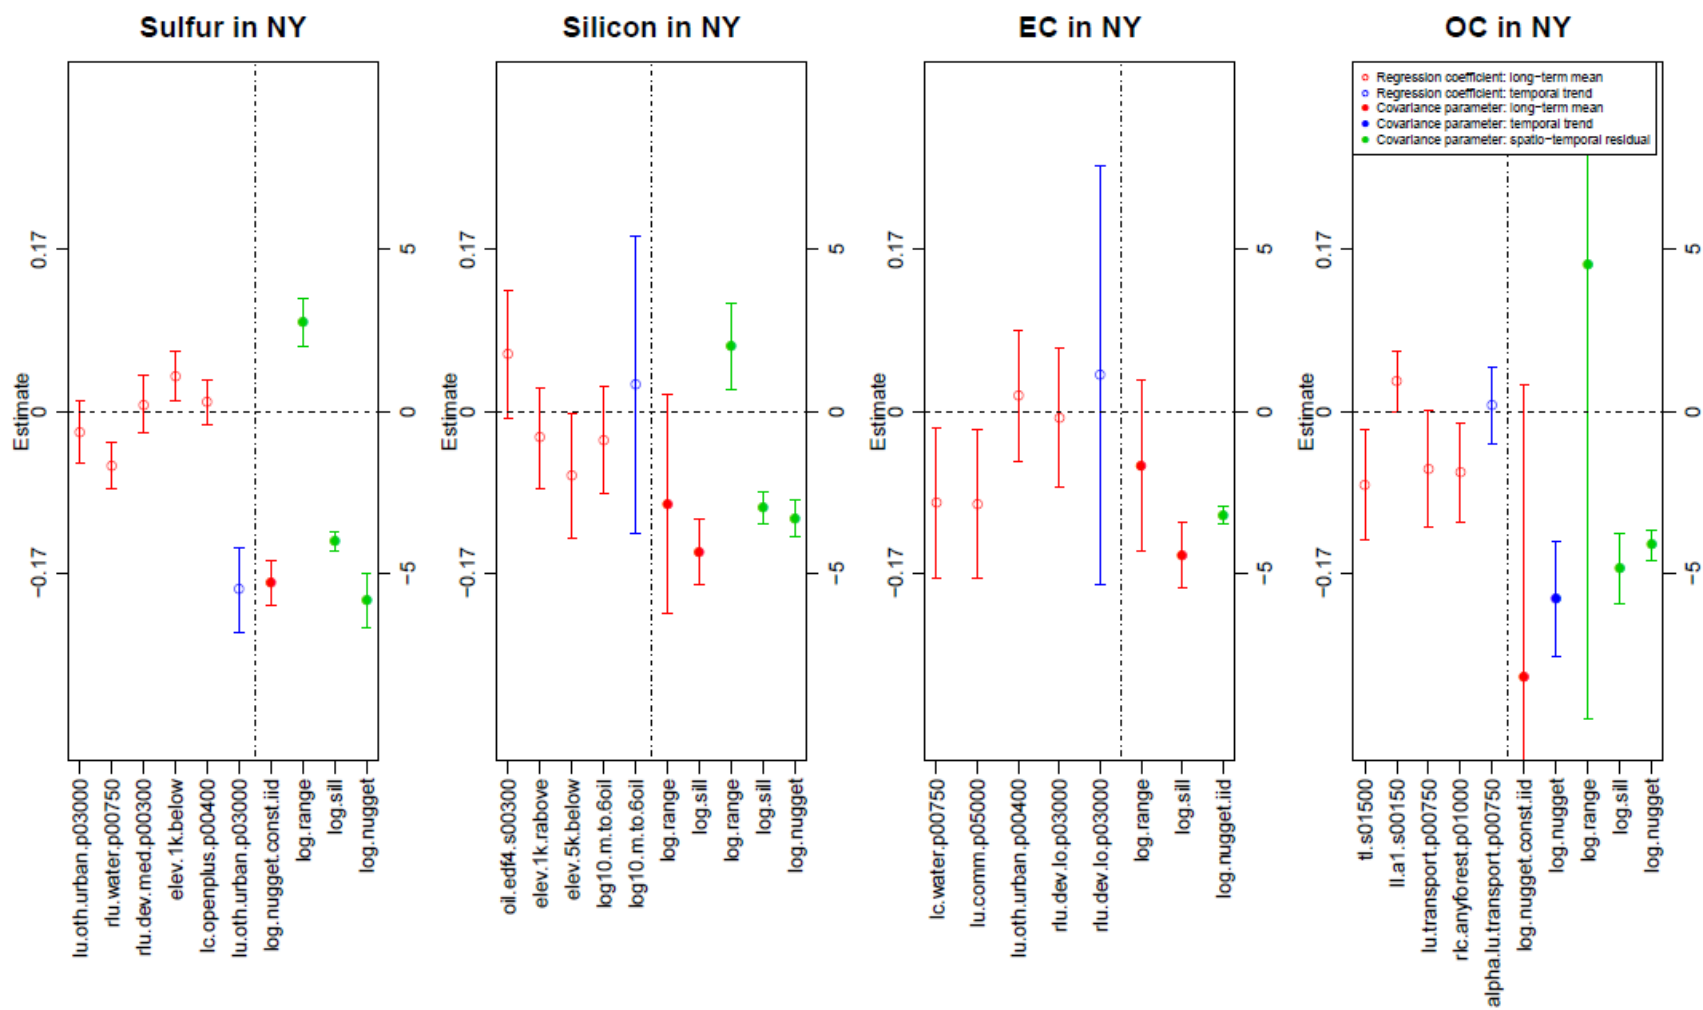

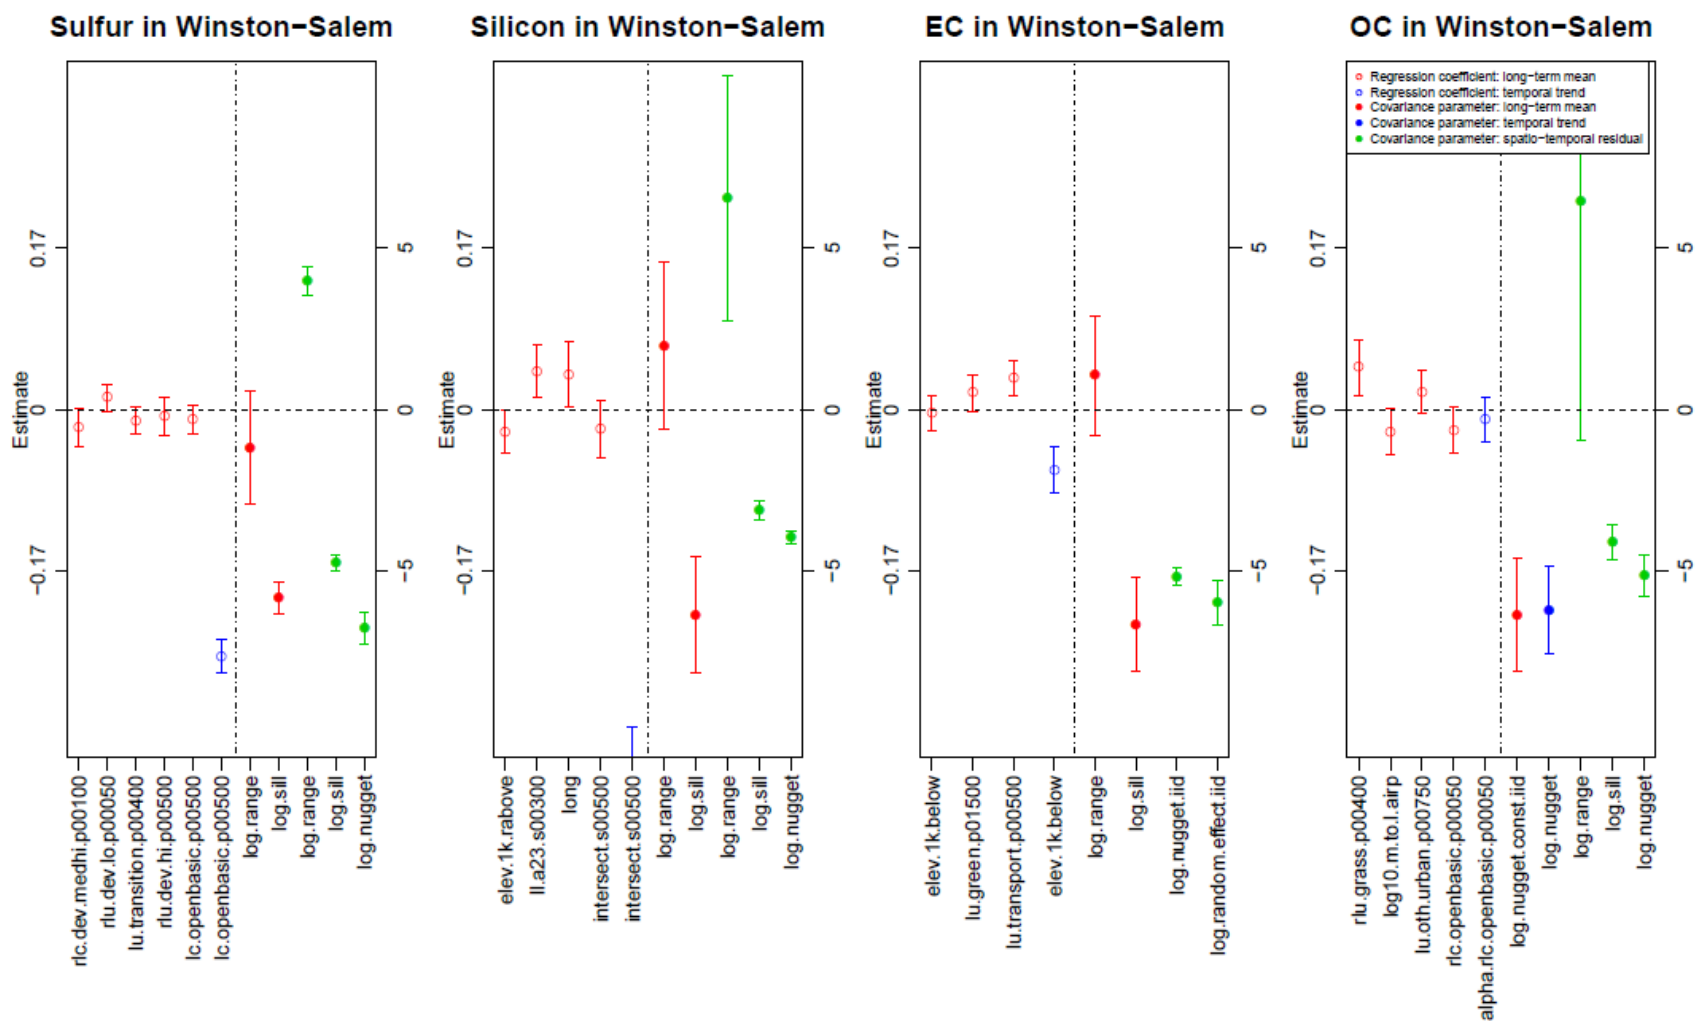

Figure S4. Estimated parameters for the selected geographical variables (scaled) and covariance structure in the spatio-temporal model for the four log-transformed PM<sub>2.5</sub> components in the six MESA cities

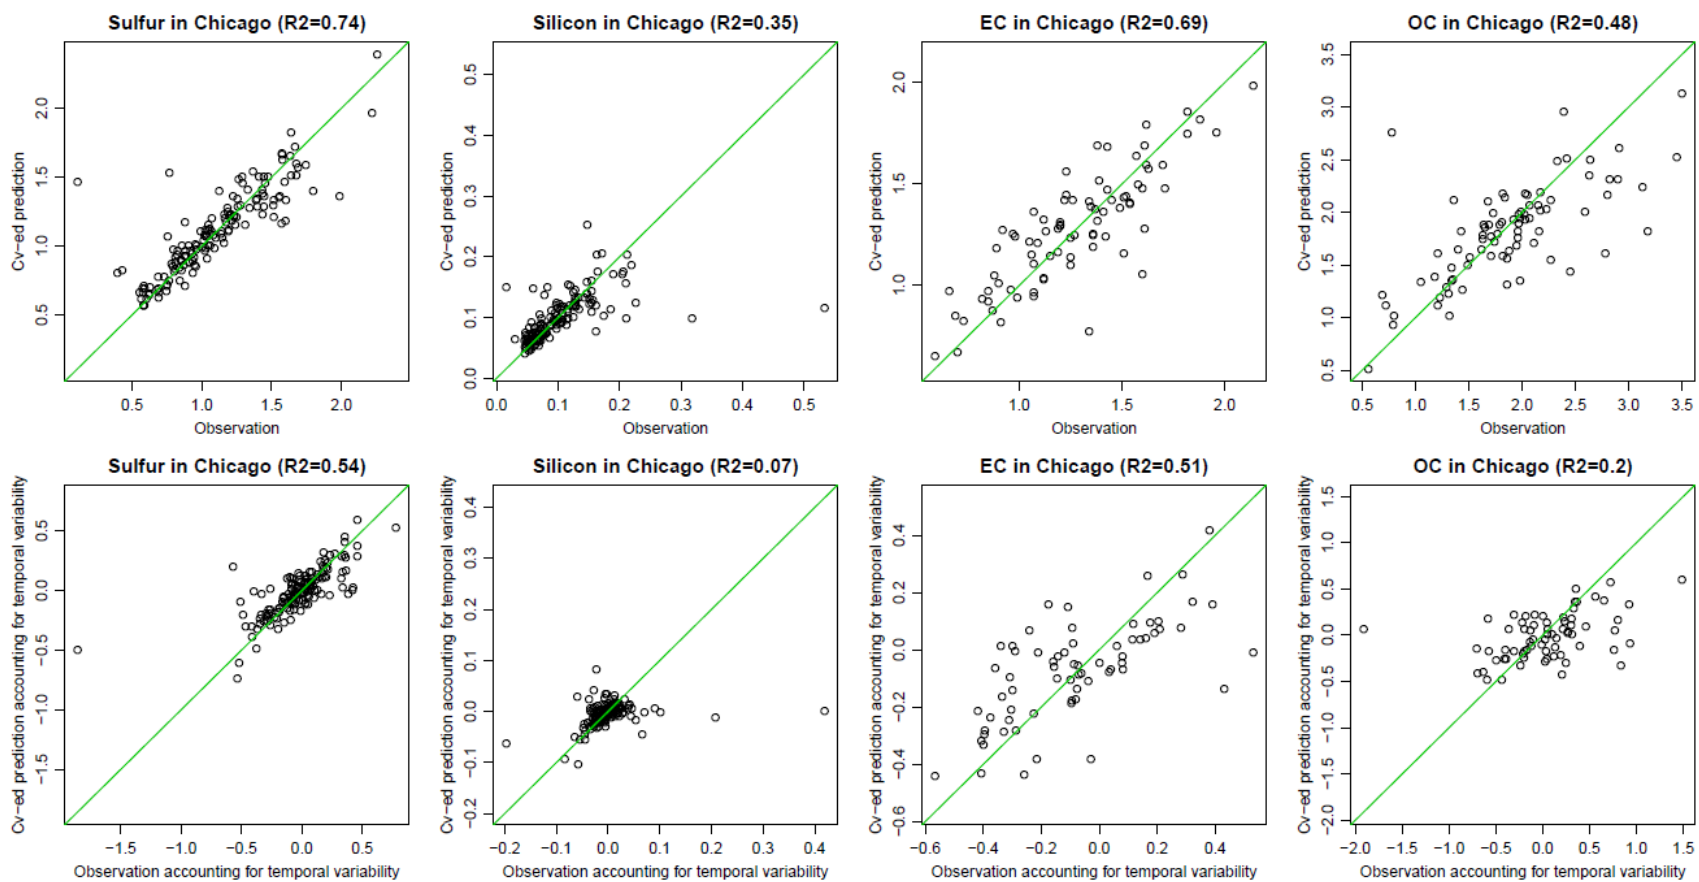

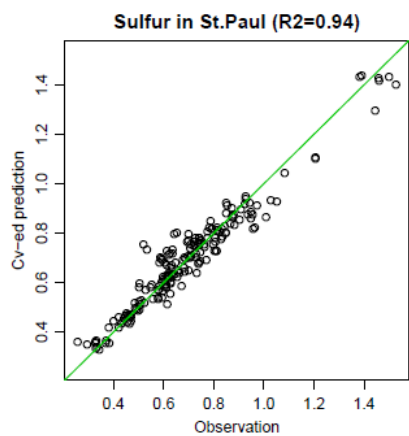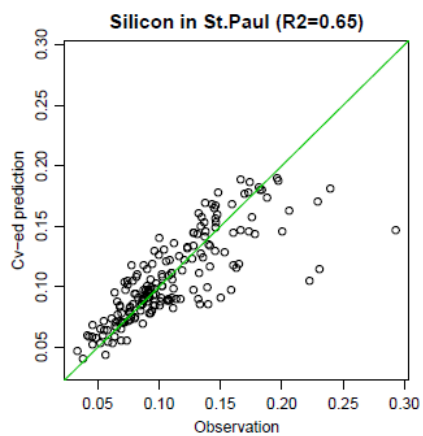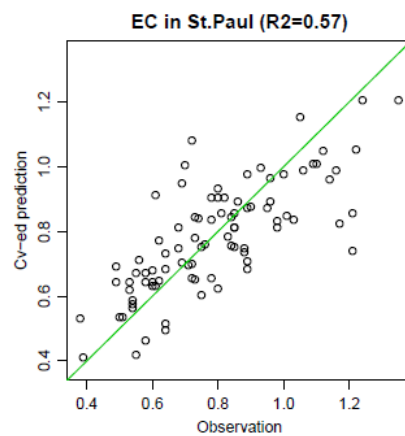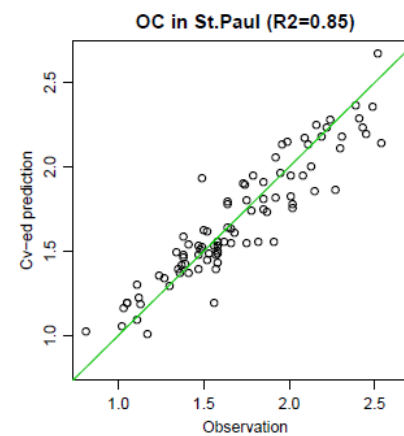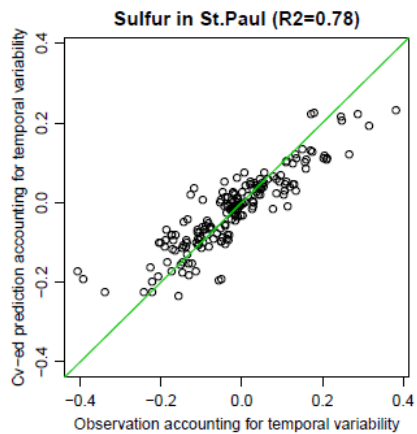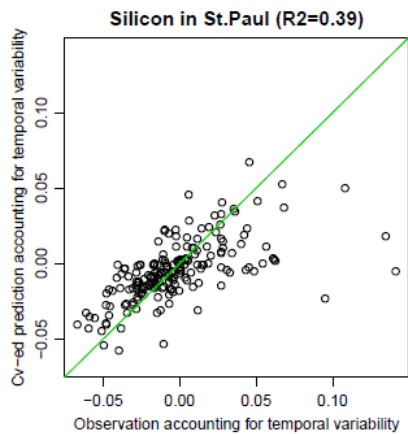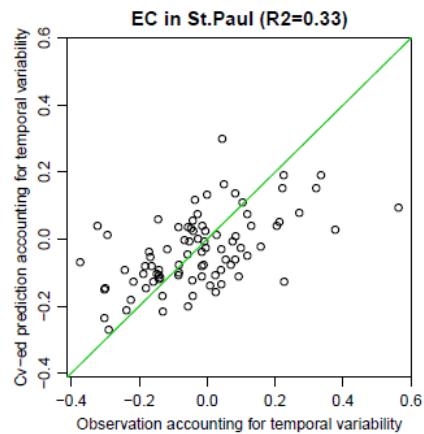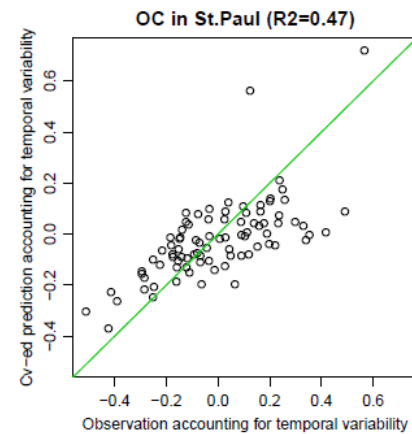

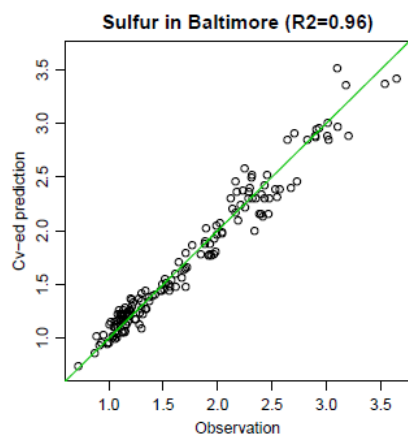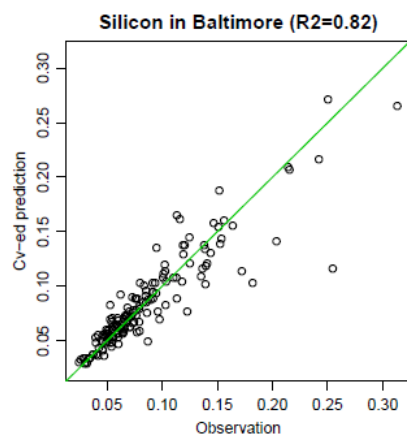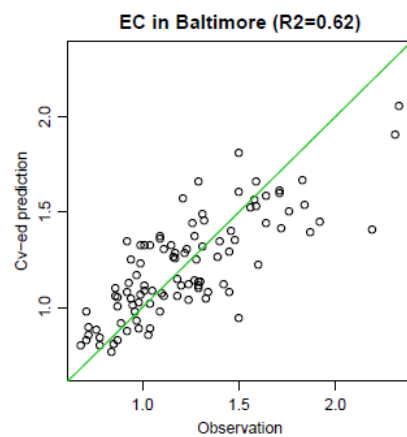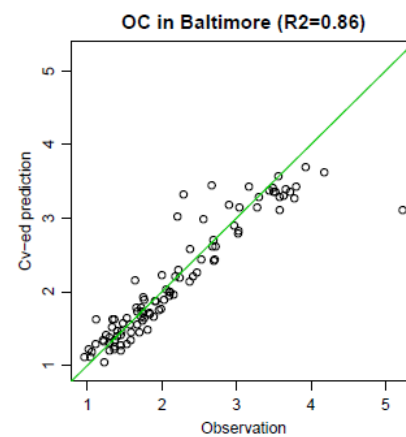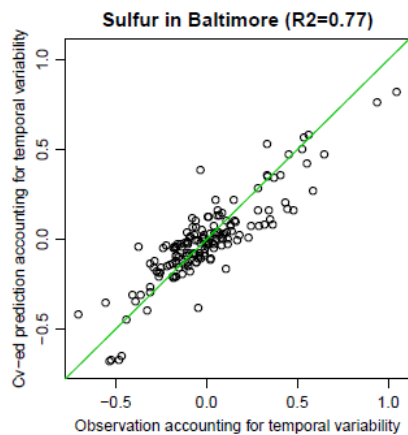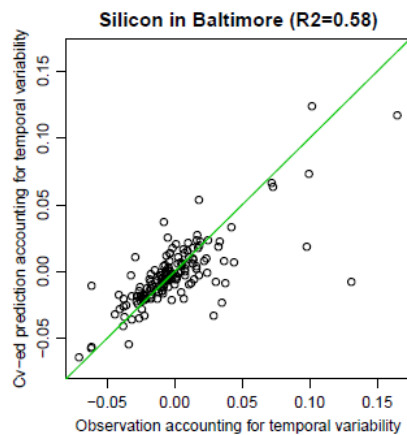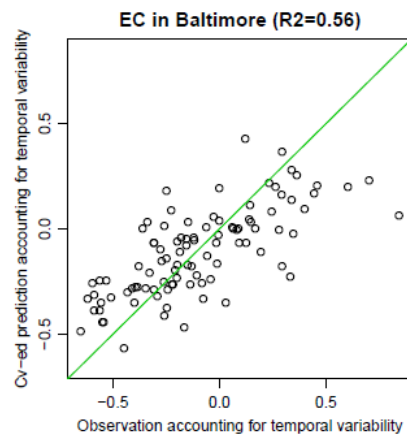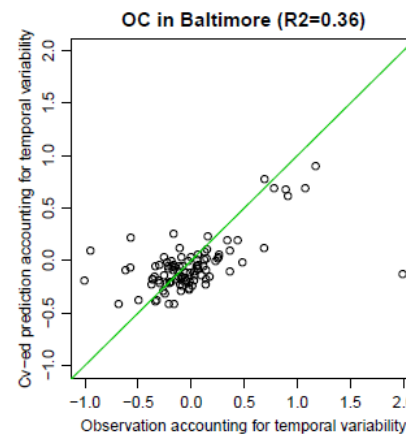

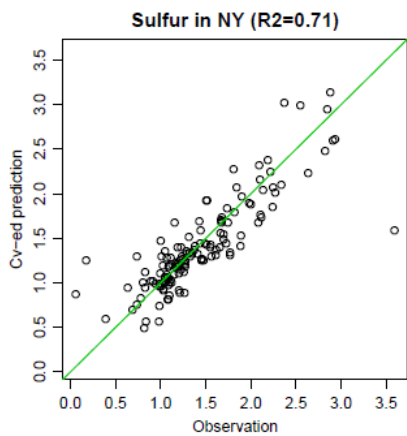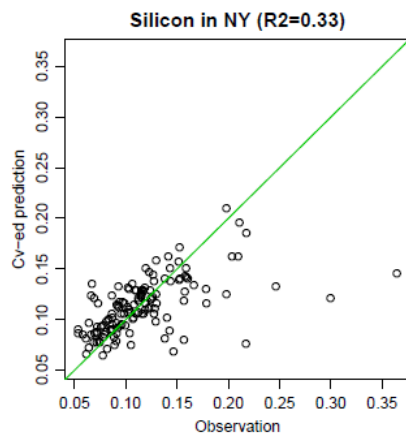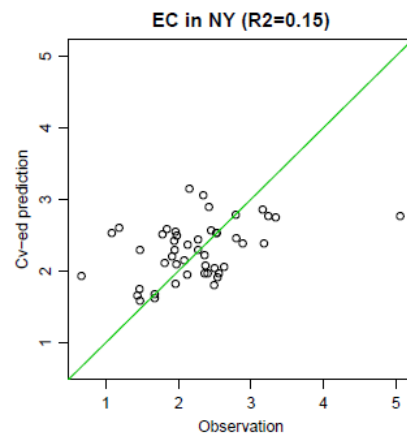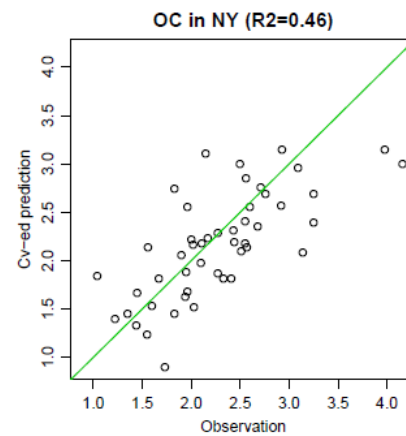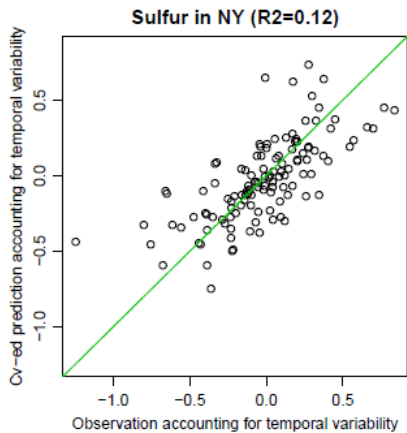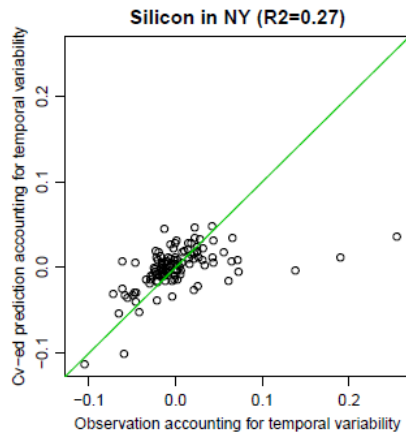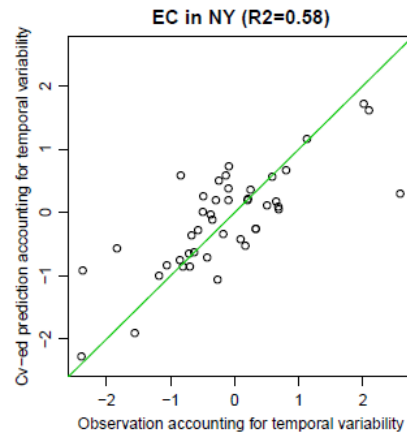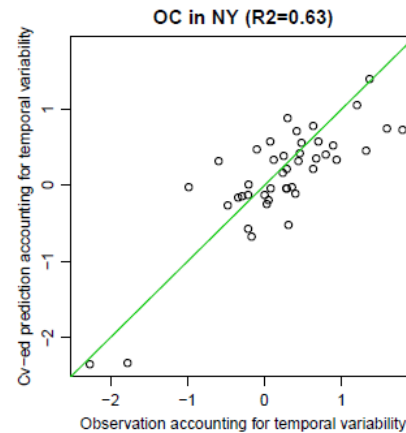



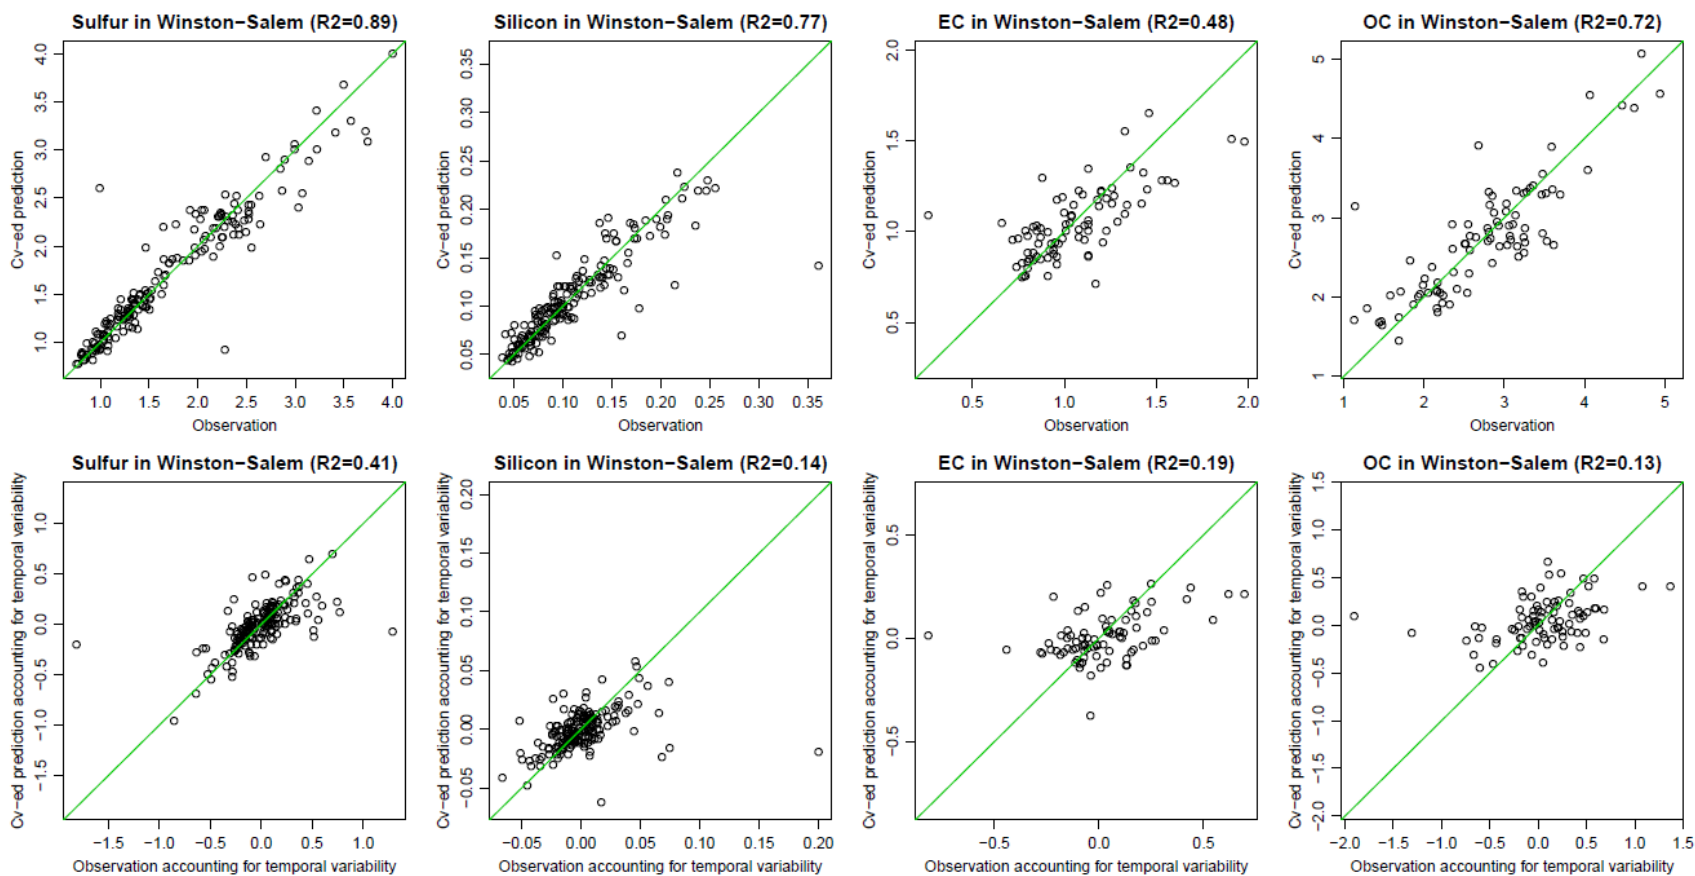

Figure S5. City-specific scatter plots of observations and cross-validated predictions from the spatio-temporal model for 2-week average concentrations (top) and for 2-week average concentrations accounting for temporal variability (bottom) across home-outdoor sites in five MESA city areas (except Los Angeles)

Los Angeles

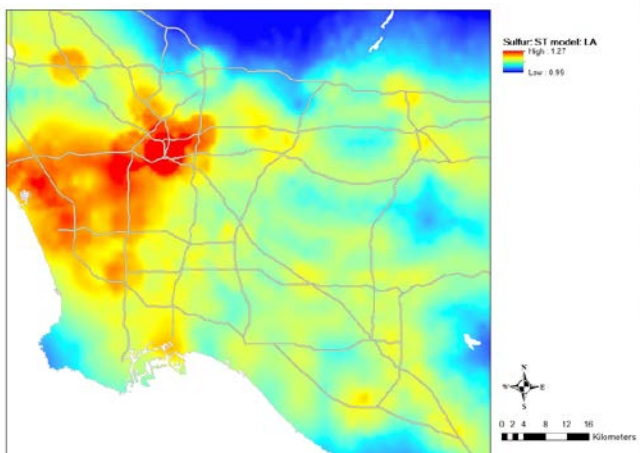

Chicago

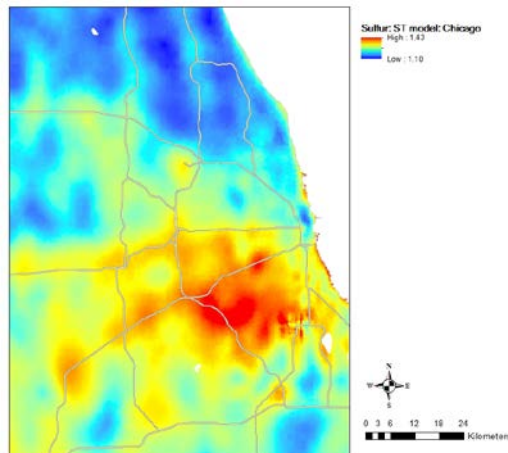

St. Paul

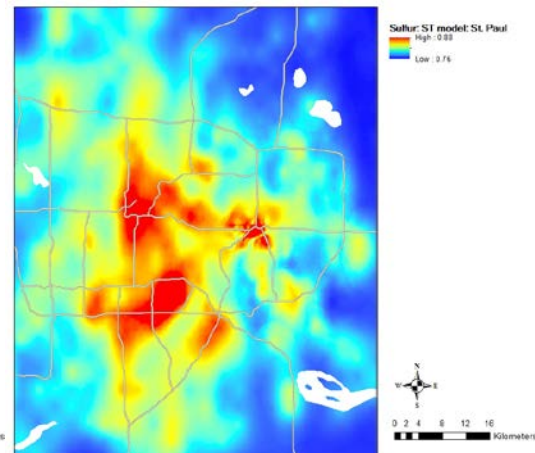

Baltimore

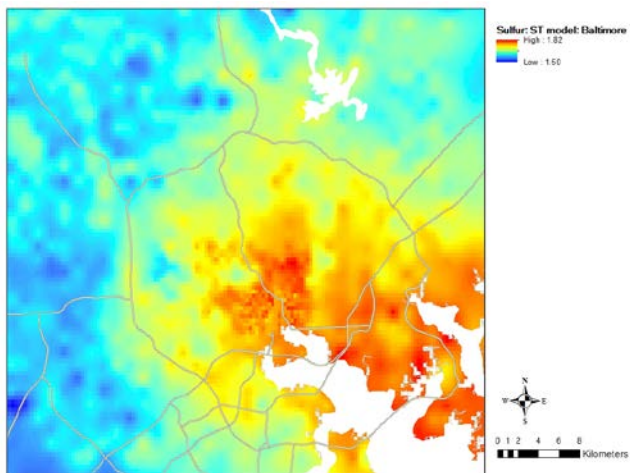

New York

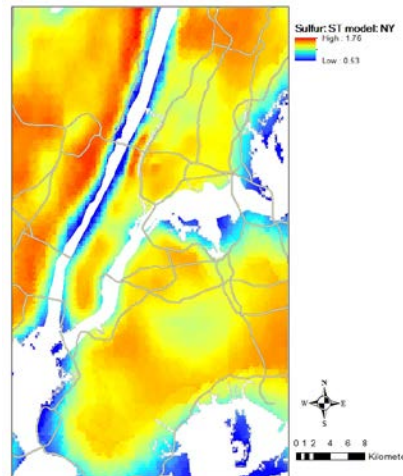

Winston-Salem

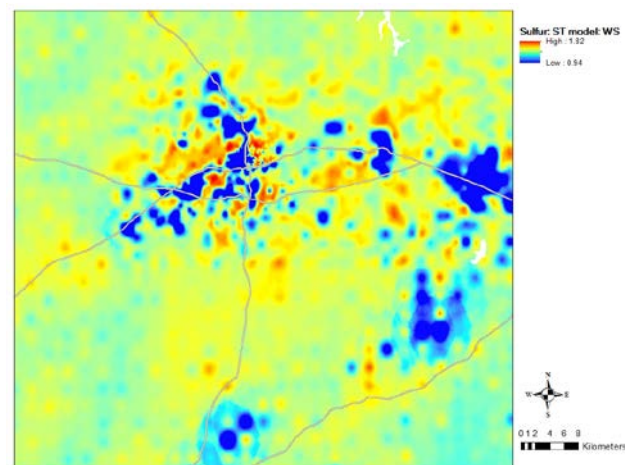

Figure S6. Maps of predicted long-term concentrations of sulfur ( $\mu\text{g}/\text{m}^3$ ) from the spatio-temporal model in the six MESA city areas

Los Angeles

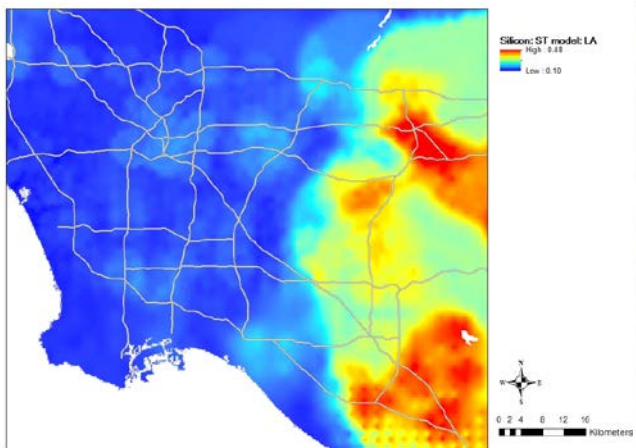

Chicago

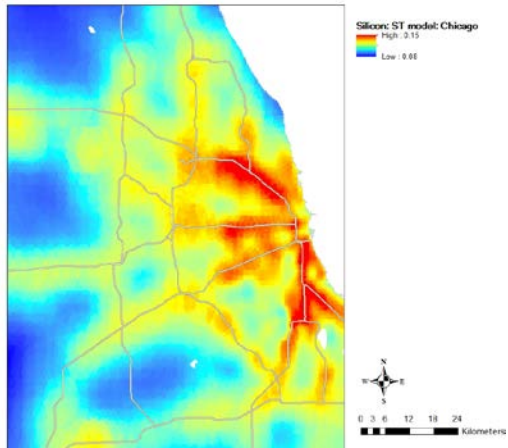

St. Paul

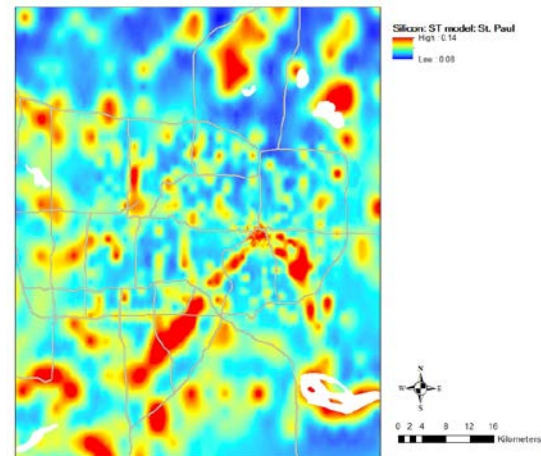

Baltimore

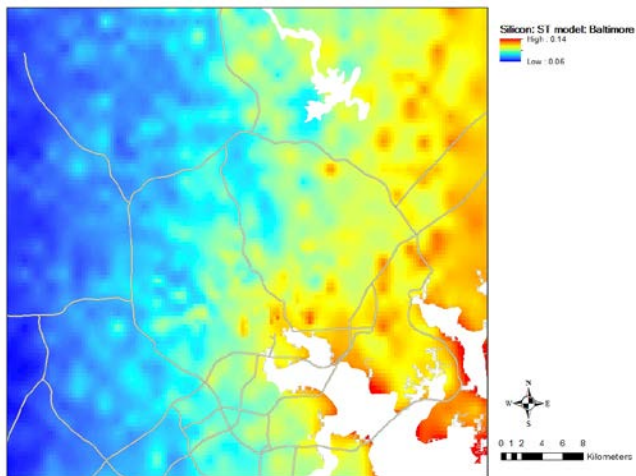

New York

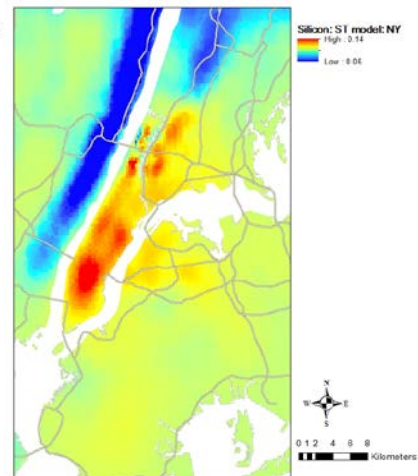

Winston-Salem

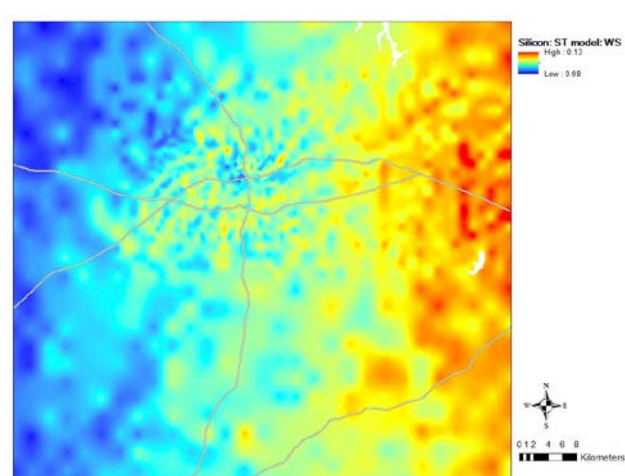

Figure S7. Maps of predicted long-term concentrations of silicon ( $\mu\text{g}/\text{m}^3$ ) from the spatio-temporal model in the six MESA city areas

Los Angeles

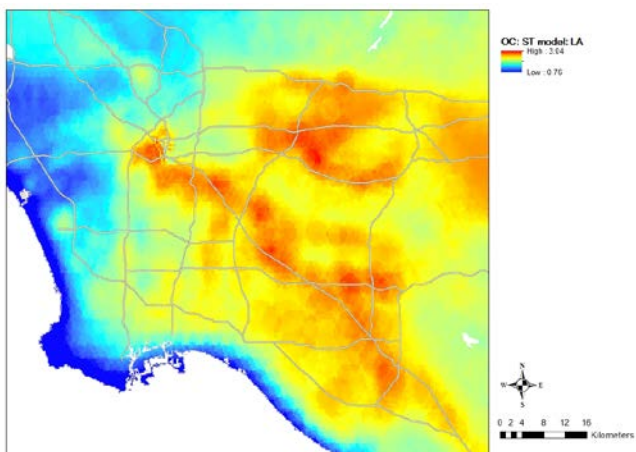

Chicago

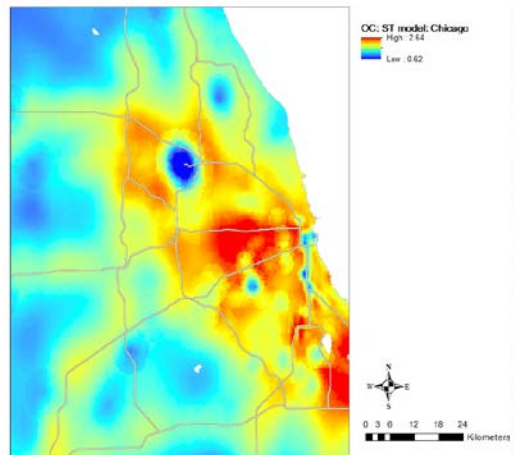

St. Paul

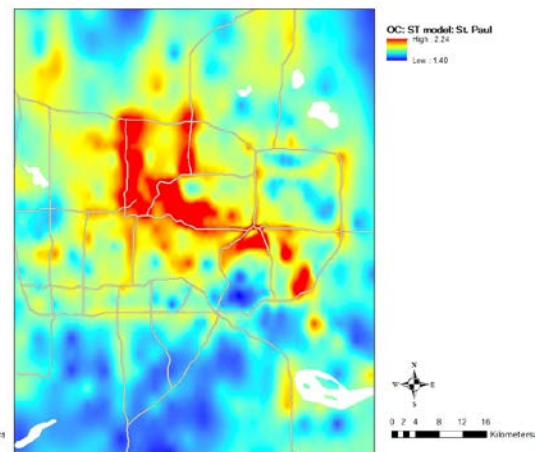

Baltimore

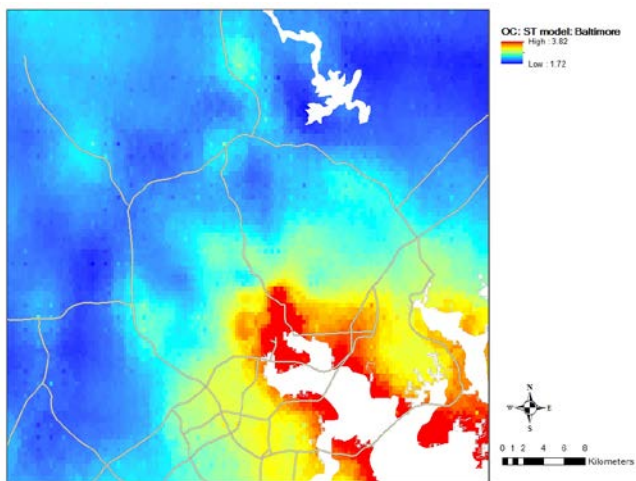

New York

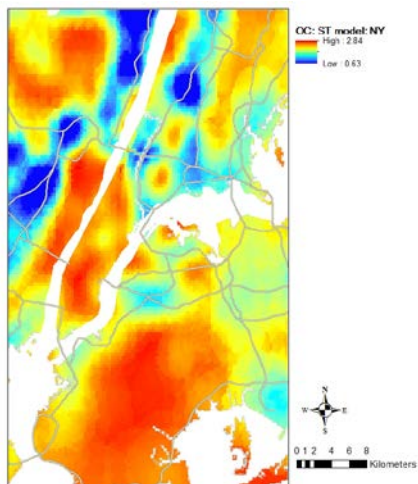

Winston-Salem

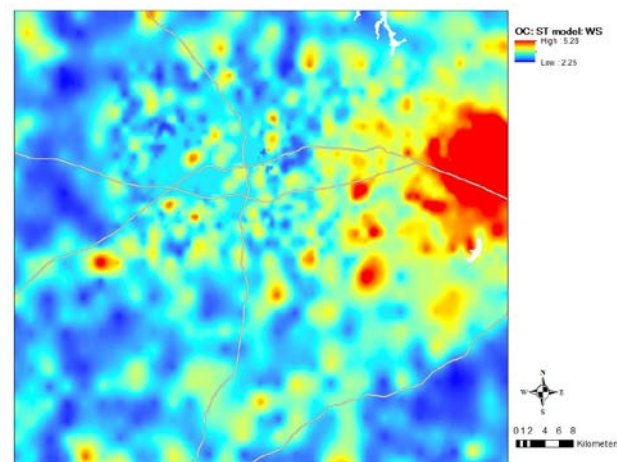

Figure S8. Maps of predicted long-term concentrations of OC ( $\mu\text{g}/\text{m}^3$ ) from the spatio-temporal model in the six MESA city areas

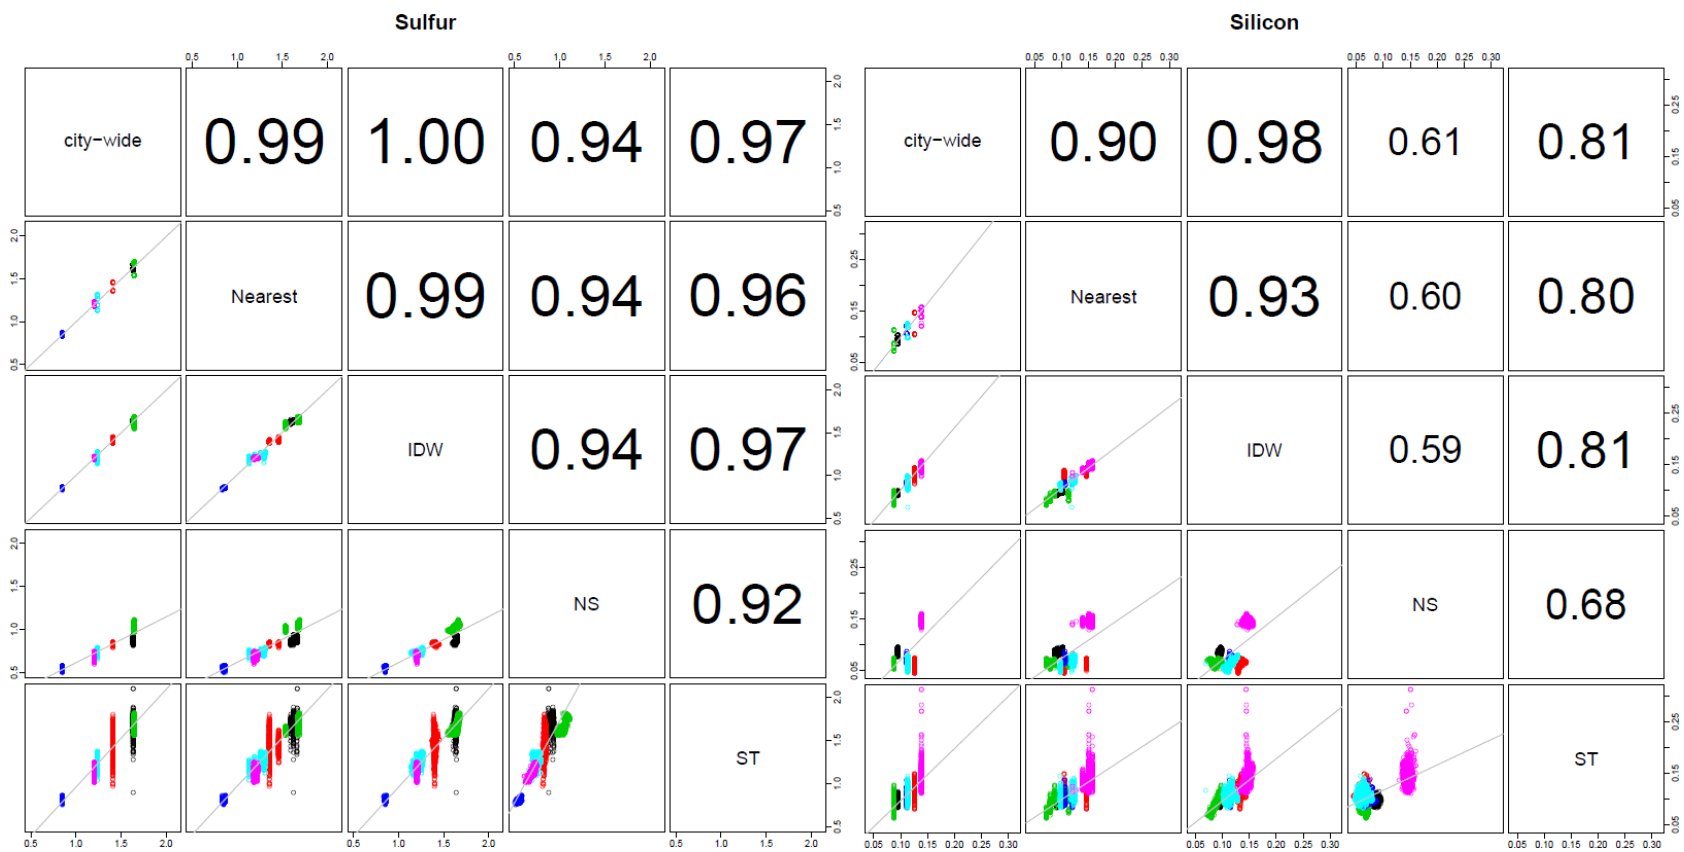

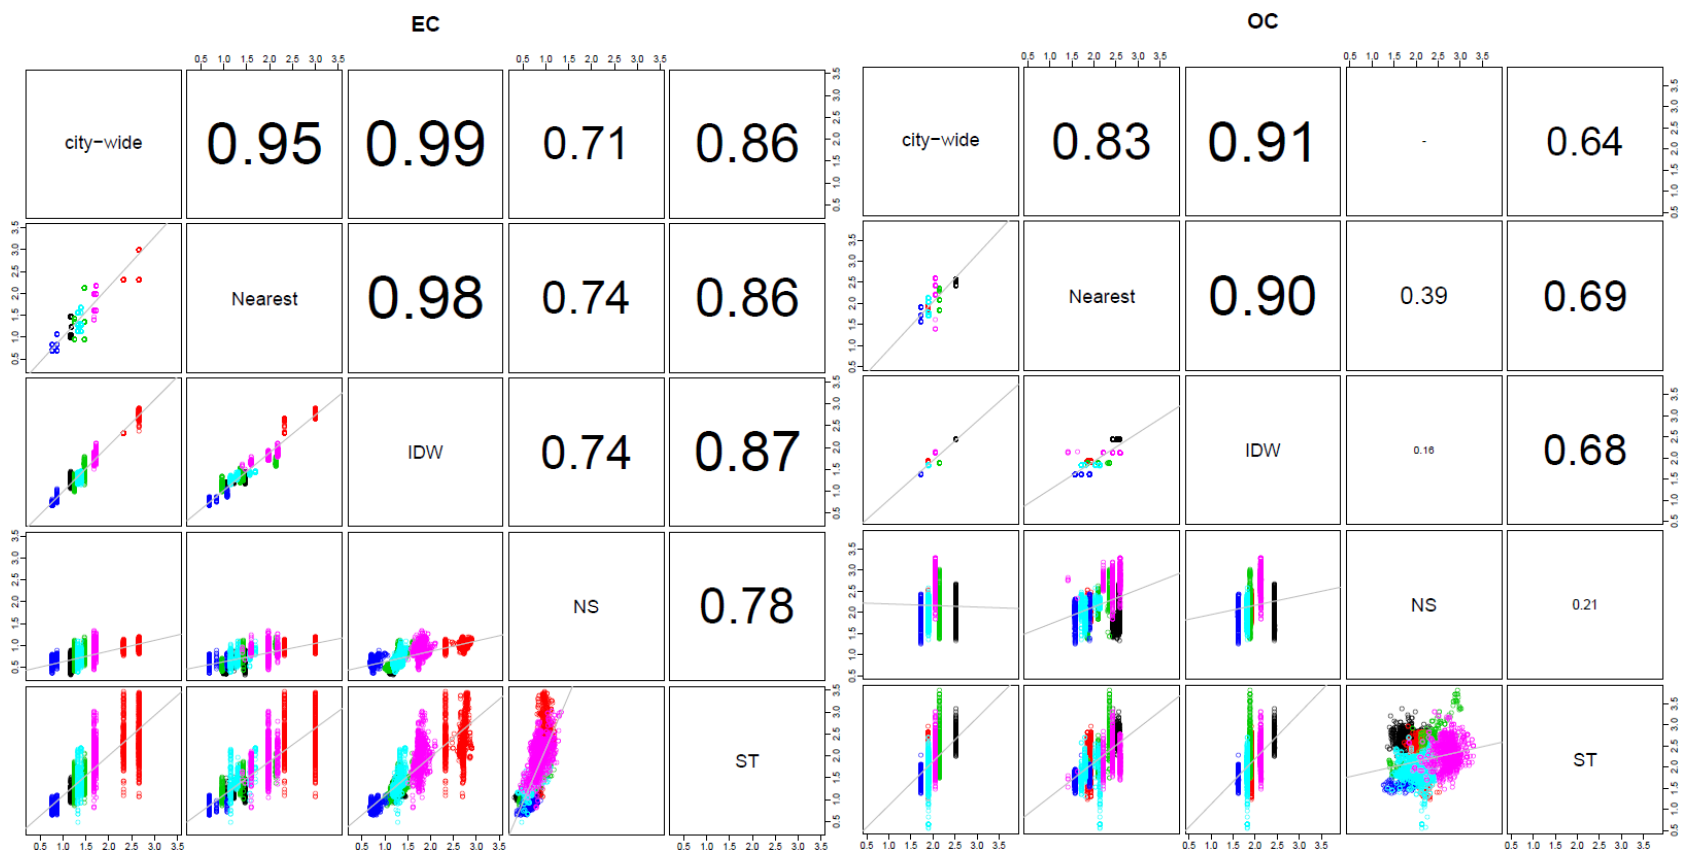

Figure S9. Scatter plots and correlation coefficients of predicted long-term concentrations of four PM<sub>2.5</sub> components between the five different prediction models (city-wide, nearest monitor, IDW (inverse distance weighting), NS (national spatial model), and ST (spatio-temporal model)) for MESA participant addresses within 10 kilometers of any NPACT/MESA Air monitors in six MESA city areas (color code: black = Winston-Salem, red = NY, green = Baltimore, blue = St. Paul, light blue = Chicago, and pink = LA).

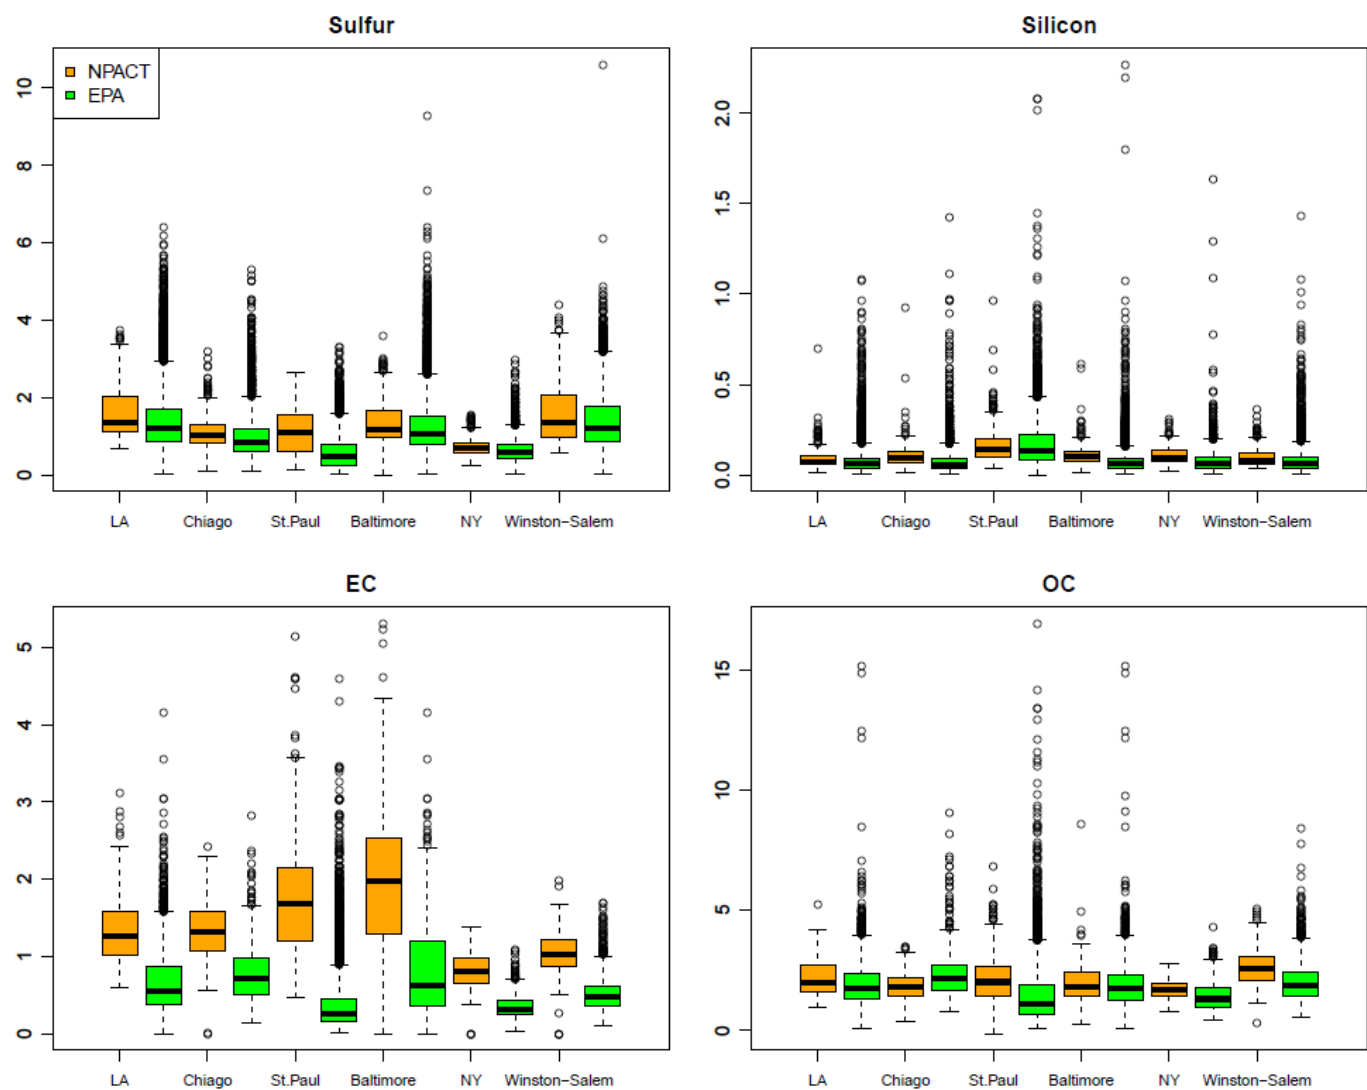

Figure S10. Box plots of measurements for four PM<sub>2.5</sub> components by NPACT/MESA Air and CSN/IMPROVE monitoring campaign by the six MESA city areas defined by 200 kilometers within the centers of six MESA cities (2 week samples for NPACT/MESA Air and daily samples on every 3<sup>rd</sup> and 6<sup>th</sup> day schedule for CSN/IMPROVE)
